1 **Dynamic interplay of protrusive microtubule and contractile actomyosin forces**  
2 **drives tissue extension**

3

4 Amrita Singh<sup>1, 2, 5</sup>, Sameedha Thale<sup>1, 2, 5</sup>, Tobias Leibner<sup>3</sup>, Andrea Ricker<sup>4</sup>, Harald  
5 Nüsse<sup>4</sup>, Jürgen Klingauf<sup>2, 4</sup>, Mario Ohlberger<sup>3</sup> and Maja Matis<sup>1, 2, \*</sup>

6

7 **Affiliations**

8 <sup>1</sup>Institute of Cell Biology, Medical Faculty, University of Münster, Münster, Germany.

9 <sup>2</sup>'Cells in Motion' Interfaculty Centre, University of Münster, Münster, Germany.

10 <sup>3</sup>Applied Mathematics, Institute for Analysis and Numerics, University of Münster,  
11 Münster, Germany.

12 <sup>4</sup>Institute of Medical Physics and Biophysics, Medical Faculty, University of Münster,  
13 Münster, Germany.

14 <sup>5</sup>These authors contributed equally.

15

16 \* To whom correspondence should be addressed: [matism@uni-muenster.de](mailto:matism@uni-muenster.de)

17

18 Contact Information:

19 Institute of Cell Biology, ZMBE

20 Von-Esmarch-Straße 56

21 48149 Münster, Germany

22 Tel.: +49 251 83 57183

23 Fax: +49 251 83 58616

24 E-mail: [matism@uni-muenster.de](mailto:matism@uni-muenster.de)

25

26

27 [Key words: Drosophila, tissue morphogenesis, wing epithelium, cell shape,](#)  
28 [actomyosin, microtubules](#)

29 **Abstract**

30 In order to shape a tissue, cell-based mechanical forces have to be integrated into  
31 global force patterns. Over the last decades, the importance of actomyosin contractile  
32 arrays, which are the key constituents of various morphogenetic processes, has been  
33 established for many tissues. Intriguingly, recent studies demonstrate that the  
34 microtubule cytoskeleton mediates folding and elongation of the epithelial sheet  
35 during *Drosophila* morphogenesis, placing microtubule mechanics *en par* with actin-  
36 based processes. While these studies establish the importance of both cytoskeletal  
37 systems during cell and tissue rearrangements, a mechanistic explanation of their  
38 functional hierarchy is currently missing. Here, we dissect the individual roles of these  
39 two key generators of mechanical forces during epithelium elongation. We  
40 demonstrate that microtubules dictate cell shape changes and actomyosin refines  
41 them. Combining experimental and numerical approaches, we find that altering the  
42 microtubule and actomyosin functions results in predictable changes in tissue shape.  
43 We further show that planar polarized microtubule patterning is independent of cell  
44 geometry and actomyosin-based mechanics. These results support a hierarchical  
45 mechanism, whereby microtubule-based forces in some epithelial systems prime  
46 actomyosin-generated forces.

## 47 **Introduction**

48 Tissue morphogenesis results from a finely tuned spatial and temporal integration of  
49 various cellular behaviors, including changes in cell shape and size, cell migration,  
50 division, and cell intercalation (Gilmour et al., 2017). These distinct behaviors are  
51 driven by tissue intrinsic and extrinsic mechanisms, which jointly coordinate  
52 mechanical forces exerted on cells during tissue patterning (Collinet and Lecuit, 2021,  
53 Heisenberg and Bellaiche, 2013, Pinheiro and Bellaiche, 2018). Within individual cells,  
54 actomyosin filaments together with microtubules and intermediate filaments form the  
55 composite cytoskeleton that controls cell mechanics during tissue remodeling. While  
56 studies have already established the importance of actin-based mechanical forces  
57 coupled via intercellular adherens junctions (Clarke and Martin, 2021), relatively little  
58 is known about the contribution of other cytoskeletal components to cell shape  
59 changes and cell mechanics during morphogenesis. Microtubules were initially  
60 considered to participate only in a supporting role in cell mechanics, contributing, for  
61 instance, to the stabilization of the actomyosin or trafficking of adhesion molecules  
62 (Bouchet and Akhmanova, 2017, Etienne-Manneville, 2013, Stehbens and  
63 Wittmann, 2012). However, recent work has challenged this view, demonstrating that  
64 microtubules are capable of generating protrusive forces that are crucial for key  
65 morphogenetic processes, including tissue bending and tissue extension (Singh et al.,  
66 2018, Takeda et al., 2018, Matis, 2020). Yet, while these studies demonstrate that  
67 actomyosin and microtubule-based forces are equally important, it remains unclear  
68 how these force-generating systems interact. For instance, how are different forces  
69 directed in space and time, and what is the hierarchy between them?

70

71 Here, we used the fruit fly *Drosophila melanogaster* wing development, a versatile  
72 model system for *in vivo* studies of force patterning, to probe the interplay between  
73 actin and microtubule dynamics. During pupal wing morphogenesis, the epithelium  
74 initially displays substantial cell shape changes (14-18 hours After Puparium  
75 Formation; hAPF), followed by cell rearrangements (22-28 hAPF) (Classen et al.,  
76 2005, Aigouy et al., 2010, Bardet et al., 2013).

77 Initial cell elongation during phase I (14-18 hAPF) relies on the coordinated  
78 generation and integration of local microtubule-based forces into a global tissue force  
79 pattern along the proximal-distal axis (Singh et al., 2018). The proximal-distal  
80 alignment of microtubules results from the planar polarization of the tissue through the

81 Fat planar cell polarity (Fat-PCP) signaling pathway (Harumoto et al., 2010, Matis et  
82 al., 2014, Olofsson et al., 2014). Fat-PCP consists of the atypical cadherins, Fat (Ft)  
83 and Dachshous (Ds), and the Golgi resident protein Four-jointed (Fj), a transmembrane  
84 kinase (Zeidler et al., 2000, Villano and Katz, 1995, Yang et al., 2002, Ma et al., 2003).  
85 Ft and Ds interact across adherens junctions, forming heterodimers across adjacent  
86 cells that Fj modulates. As Fj and Ds expression both display gradients along the  
87 proximal-distal axis, Ft–Ds heterodimers accumulate in a polarized fashion along the  
88 global axis. The net result is the conversion of tissue-wide transcriptional gradients of  
89 Fj and Ds into functional polarization of Ft-Ds at the cellular level, thereby providing a  
90 spatial cue to orient diverse developmental processes. Consistently, Ft-PCP was  
91 shown to orient cell divisions, tissue growth, cell rearrangements and cell migration in  
92 *Drosophila*, zebrafish and mammals (Zakaria et al., 2014, Mao et al., 2016, Saburi et  
93 al., 2008, Baena-Lopez et al., 2005, Aigouy et al., 2010, Mao et al., 2011, Chen et al.,  
94 2018, Durst et al., 2015, Li-Villarreal et al., 2015). Unlike the initial steps described  
95 above, wing tissue remodeling during phase II (22-28 hAPF) depends on extrinsic  
96 tensile forces generated by wing hinge contraction that starts at 18 hAPF (Etournay et  
97 al., 2015, Ray et al., 2015, Sugimura and Ishihara, 2013, Aigouy et al., 2010). Here,  
98 an apical extracellular matrix protein Dumpy anchors the wing epithelium to the  
99 adjacent cuticle (Ray et al., 2015, Etournay et al., 2015). The attachment of the wing  
100 tissue to the cuticle leads to resistance to pulling forces generated by hinge  
101 constriction, resulting in tension along the proximal-distal axis. Subsequently, the  
102 buildup tension drives wing remodeling, including cell shape changes, oriented cell  
103 divisions and rearrangements along the same axis (Aigouy et al., 2010, Sugimura and  
104 Ishihara, 2013).

105 In this study, we focus on the interplay of actin and microtubule-based forces  
106 during phase I (Supp Figure 1A). While previous studies establish the presence of both  
107 systems during early pupal wing morphogenesis (Singh et al., 2018, Sugimura and  
108 Ishihara, 2013), the exact contribution of microtubule and MyosinIII-generated forces  
109 to cell and wing shape remains an open and intriguing question. Our work uncovers  
110 that the balance of actomyosin and microtubule-generated forces control cell  
111 lengthening during epithelium development. The proposed mechanism controlling  
112 local mechanics, which in turn coordinates cell behaviors, is likely relevant to many  
113 other tissues that are planar polarized by the Ft-PCP signaling pathway.



## 114 **Results**

115

### 116 **MyosinII anisotropy leads to junctional tension pattern**

117 As previously demonstrated (Singh et al., 2018), MyosinII localizes during phase I (14-  
118 18 hAPF) to the apical cell junctions, where it is planarly polarized along the longer  
119 (proximal-distal) axis of the elongating cells, forming anisotropic cables across the  
120 entire wing tissue (Figure 1A). Intriguingly, ablated junctions aligned along the  
121 proximal-distal axis retract stronger upon incision than junctions aligned along the  
122 anterior-posterior axis (Figure 1B and Supp Figure 1B,C), arguing for an anisotropic  
123 distribution of tension at adherens junctions.

124 To further explore this observation, we visualized the active phosphorylated  
125 form of myosin light chain (pMRLC), a bona fide marker for actomyosin contractility  
126 (Ikebe and Hartshorne, 1985). Notably, in 18 hAPF wings, pMRLC is enriched at the  
127 apical region and associated with cell junctions (Figure 1A). Consistently,  
128 quantification of pMRLC polarity demonstrated significant enrichment of pMRLC at  
129 proximal-distal oriented junctions that recoiled faster upon ablation (Figure 1C).  
130 Although MyosinII anisotropy positively correlates with the junctional tension pattern,  
131 it does not account for the possibility that unconventional myosin motor proteins may  
132 also contribute to junctional contractility (Bosveld et al., 2012, Lin et al., 2007). To  
133 account for this possibility, we selectively disrupted MyosinII function and assessed its  
134 effects on cell shape changes during early developmental stages. This was  
135 accomplished by taking advantage of a degron-based protein knockdown system  
136 (deGradFP) (Caussin et al., 2011), which was efficiently used to deplete the GFP-  
137 tagged MyosinII light chain Sqh (Sqh-GFP) at the different developmental stage  
138 (Caussin et al., 2011, Pasakarnis et al., 2016). Since expression of deGradFP  
139 resulted in early embryonic lethality of males, we used the tub-Gal80<sup>ts</sup> system that  
140 allows a temporal regulation of gene expression. To ensure that the final  
141 developmental stage was equivalent to 18 hAPF at 25°C, we first standardized the  
142 growth protocol in the presence of a temperature shift (i.e., 18°C to 29°C, see Table 1,  
143 Supplemental information). Next, the selected temperature regime was validated by  
144 quantifying cell elongation and apical cell area (Supp Figure 2A-D). Expression of the  
145 deGradFP system disrupted actomyosin cables in MyosinII depleted cells (Figure  
146 1A,D). To test for changes in tension at adherens junctions along the proximal-distal  
147 axis, we next performed laser ablation experiments (Supp Figure 2E). Compared to

148 controls (Sqh-GFP male and deGradFP female), deGradFP males displayed a striking  
149 drop in recoil velocity (Figure 1E), indicative of reduced tension along the MyosinII  
150 enriched junctions. Consistently, deGradFP mediated knockdown showed a strong  
151 reduction of overall MyosinII phosphorylation (Figure 1D,F). Notably, deGradFP-  
152 mediated knockdown of Sqh-GFP presented phenotypes reminiscent of MyosinII loss-  
153 of-function mutants in *Drosophila* (Supp Figure 3). Finally, deGradFP females, which  
154 carry a wild-type copy of MyosinII, show no defects observed in deGradFP males  
155 providing the evidence that the system does not cause any MyosinII-unspecific  
156 phenotypes (Supp Figure 4). Collectively, these results establish that MyosinII  
157 promotes the formation of the polarized junctional tension along the main tissue axis  
158 and excludes the possible contribution of unconventional myosin motors to patterned  
159 junctional tension.

160

### 161 **The interplay between microtubule and actomyosin regulates cell shape**

162 Initial cell elongation during pupal wing development takes place between 14 to 18  
163 hAPF (Aigouy et al., 2010, Singh et al., 2018). To test whether polarized MyosinII also  
164 participates in this process, we examined cell shape changes upon MyosinII inhibition  
165 (Figure 2A). Strikingly, quantification of cell length showed that cells depleted of  
166 MyosinII were significantly longer than control cells (Figure 2B, green). Together with  
167 the observed MyosinII polarization along proximal-distal junctions (Figure 1A), these  
168 findings suggest that MyosinII mediates contractile stress to limit the cell length. In  
169 addition, it posits that Myosin-independent forces are needed for cell elongation.

170 As previously described, wing cell elongation entails microtubule alignment  
171 along the proximal-distal axis (Singh et al., 2018), whereby microtubule patterning is  
172 regulated through the Fat-PCP signaling pathway (Harumoto et al., 2010, Matis et al.,  
173 2014, Olofsson et al., 2014). We thus hypothesized that in MyosinII depleted cells,  
174 where cortical tension is reduced, microtubule-generated protrusive forces may drive  
175 cell elongation. Should this indeed be the case, polarized microtubule patterning  
176 should also occur in deGradFP flies lacking actomyosin contractility. Strikingly,  
177 microtubule alignment along the proximal-distal axis was comparable for deGradFP  
178 and control flies (Figure 2C-C'). Quantification of the angular distribution of  
179 microtubules with respect to the proximal-distal axis revealed that in deGradFP flies,  
180 84% of all microtubules aligned within 0-30° from the principal proximal-distal axis,  
181 which is analogous to control cells (85%) (Figure 2D). These data suggest that

182 patterned microtubule cytoskeleton directs cell shape changes. To further strengthen  
183 the validity of this hypothesis, we probed whether misalignment of microtubules results  
184 in shorter cells (Figure 2A). Indeed, cells in *ft* mutant animals rescued for the Hippo  
185 pathway (hereafter called *ft-PCP* mutant), in which microtubules are misoriented  
186 (Figure 2C''), display a smaller cell elongation index (EI, defined by the ratio of the  
187 length of the longest cell axis to the shortest cell axis) (Singh et al., 2018). Considering  
188 that an increase in cell width and a decrease in cell length both lower the EI, we next  
189 measured the absolute cell length in the *ft-PCP* mutant. Consistent with the role of  
190 aligned microtubules for cell elongation, we find that cells indeed become shorter in  
191 the *ft-PCP* mutant background (Figure 2B, red). Finally, as disrupted cell polarity in the  
192 *ft-PCP* mutant may lead to cell shape changes independently of microtubule-  
193 generating forces, we took advantage of Patronin to specifically perturb microtubule  
194 organization. Members of the calmodulin-regulated spectrin-associated protein  
195 (CAMSAP) family in vertebrates and Patronin in invertebrates play an essential role in  
196 organizing microtubule cytoskeleton in several differentiated cells (Noordstra et al.,  
197 2016, Takeda et al., 2018, Toya et al., 2016, Panzade and Matis, 2021, Nashchekin et  
198 al., 2016). Consistently, Patronin knockdown in wing cells resulted in a dramatic  
199 change in the organization of apical non-centrosomal microtubules (Figure 3A,B).  
200 Importantly, Patronin depleted cells were also shorter (Figure 3C). Collectively, these  
201 independent experimental approaches consistently demonstrate that patterning of  
202 non-centrosomal microtubules mediates cell elongation.

203

204 Having established that MyosinII is dispensable for initial cell elongation, we took a  
205 closer look at its role in other aspects of cell shape changes. MyosinII appeared to be  
206 required to refine the final cell shape (Figure 2C'). This was evident from the change  
207 in curvature of cellular interfaces in deGradFP males, where MyosinII contractility was  
208 disrupted, and cortical tension was released. In addition, cells in MyosinII-depleted  
209 wings expanded and widened along the anterior-posterior axis (Figure 2E) leading to  
210 cell rounding (Figure 2F). Hence, our results demonstrate that polarized MyosinII  
211 contractility is not required for initial polarized cell elongation along the proximal-distal  
212 axis but is needed for the subsequent refinement of cell shape (Figure 2G).

## 213 **A model of force balance predicts polarized microtubule-generated protrusive** 214 **forces as an essential driver of cell elongation**

215 We aimed to formalize these findings in a force-balance model, whereby microtubule-  
216 generated protrusive forces counterbalanced by contractile actomyosin forces drive  
217 cell elongation (Figure 2A). Various continuum and agent/vertex-based models have  
218 been devised on the cell level and validated in different context (Alt et al., 2017).  
219 Further, attempts have been undertaken to rigorously derive macroscopic continuum  
220 models on the tissue level, starting from individual cell-based models (Penta et al.,  
221 2014). In most of these settings, however, the effects of the microtubule or  
222 cytoskeleton reorganization are not taken into account. We therefore developed and  
223 implemented a continuum model, which is adapted to our setting. Since in our case  
224 the cells are mechanically autonomous (Singh et al., 2018), it suffices to model a single  
225 cell. To average out microscopic details, while maintaining the structural properties,  
226 the model regards the cell from a mesoscopic point of view (Figure 4A). The  
227 microtubule cytoskeleton is modeled as a viscoelastic gel formed by polar filaments  
228 that can actively exert forces (active polar gel) (Fan and Li, 2015). The actomyosin  
229 cortex is modelled through the effective tension of the cell surface. For full details on  
230 the mathematical model, its efficient numerical discretization and implementation see  
231 (Leibner et al., 2021) and STAR methods.

232 As shown in Figure 4, our model recapitulates overall cell shape changes  
233 observed in vivo (Figure 2C-C''). For the right choice of parameters, a force balance is  
234 obtained such that the cell approximately maintains its shape in steady state (Figure  
235 4B-C). If the protrusive forces are reduced, modelling a disassembly or misorientation  
236 of the microtubules, the cell shortens along the proximal-distal axis (Figure 4D,  
237 compare lower branch of Figure 2A). On the other hand, for reduced actomyosin  
238 contractile forces (reduced effective surface tension), the cell becomes significantly  
239 elongated (Figure 4E, compare upper branch of Figure 2A).

240

## 241 **Local forces are shaping tissue morphology**

242 The findings to this point argue for an interplay of microtubule protrusive and  
243 actomyosin contractile forces as a regulatory mechanism driving cell shape changes  
244 during tissue morphogenesis. To validate this observation, we systematically tested  
245 the role of microtubule and actin-based forces during wing elongation. We reasoned

246 that changes on the cell level should translate into tissue-level changes. Strikingly, loss  
247 of MyosinII function drastically affected the tissue shape. The anterior compartment,  
248 where MyosinII function was abrogated, was significantly longer than the posterior  
249 compartment that was used as an internal wild-type control (Figure 5A,B). This is  
250 consistent with our result showing that cortical tension inversely correlates with cell  
251 elongation (Figure 1E and Figure 2B). Given that the Fat-PCP signaling pathway is  
252 required to direct microtubule-generated forces, we reasoned that in the *ft-PCP* mutant  
253 wing epithelium, where cells are shorter, the tissue would also be shorter. In agreement  
254 with our findings on the cell level, perturbation of the microtubule cytoskeleton led to a  
255 significant defect in tissue elongation (Figure 5A, bottom). Moreover, *ft-PCP* mutant  
256 tissue is similar in size and shape to the wild-type wing at the onset of cell elongation  
257 (Supp Figure 1A), further strengthening the notion that Fat-PCP-dependent patterning  
258 of forces is required for cell and tissue shape at stage I. However, to rule out unspecific  
259 effects resulting from possible interaction between the Fat-PCP pathway and MyosinII,  
260 we probed whether the global level of phosphorylated MyosinII and its polarity are  
261 preserved in *ft-PCP* mutant tissue. Despite changes in cell shape, this was the case  
262 (Figure 5C-E), revealing that the Fat-PCP signaling pathway acts upstream of the  
263 microtubule cytoskeleton in the wing epithelium but does not regulate actomyosin.  
264 Additionally, the analysis of Patronin depleted wings shows a significant reduction in  
265 wing length, confirming the specific requirements of microtubules for cell and tissue  
266 elongation (Figure 5F,G).

267 Taken together, our analysis of tissue morphogenesis illustrates that  
268 coordination of local forces generated by microtubules and not by actomyosin  
269 contractile forces are essential for tissue extension. We propose that gradients of Ds  
270 and Fj, constituents of the Fat-PCP signaling pathway, serve as an instructive cue at  
271 the cell and tissue level to pattern force generation.

272

### 273 **Initial cell shape changes are independent of extrinsic forces**

274 Cell-extrinsic tensile and compressive forces applied to cells from external loads can  
275 also drive the remodeling of tissues. Indeed, as described above, a tissue-scale force  
276 generated by hinge contraction was reported to drive cell remodeling during phase II  
277 (Etournay et al., 2015, Ray et al., 2015, Sugimura and Ishihara, 2013, Bardet et al.,  
278 2013). To account for a possible cell-extrinsic contribution to initial cell elongation, we  
279 thus explored potential extrinsic mechanical forces in our system (i.e., phase I). To

280 disentangle active cell forces from forces imposed extrinsically on wing cells, we  
281 severed the wing blade from the hinge at 18 hAPF (i.e., after the initial cell elongation  
282 and just before the onset of hinge contraction) and quantified the cell length (Supp  
283 Figure 6A, Video 1). We reasoned that if cell intrinsic forces drive the initial cell  
284 elongation, then cells should not shorten upon mechanical uncoupling of the blade  
285 from the hinge. Consistently, the analysis revealed that cells stayed elongated after 1  
286 hour (Figure 6A,B). To exclude the stiff apical cuticle material as the possible  
287 mechanical influence that may cause cells to stay elongated after being mechanically  
288 isolated, we performed a TEM analysis of 16 hAPF old wings (Figure 6C). We  
289 unequivocally could see that the epithelium was already molted at this stage (Figure  
290 6D), thus excluding a contribution of the cuticle to cell shape changes.

291 To further validate these findings, we analyzed *dumpy* mutants, where  
292 anchorage of the epithelium to the cuticle is perturbed. In the *dumpy* mutant, the tissue  
293 elongates normally compared to the *Ft-PCP* mutant, thus confirming that the cuticle  
294 cannot contribute to elongation until 18 hrs APF (Supp Figure 5A). Importantly, the  
295 observed mechanical autonomy of cells at this early stage is consistent with  
296 microtubule perturbation experiments, where cells fail to elongate (Figure 2B). In both  
297 the *ft-PCP* mutant and Patronin depleted wings, the hinge contracts normally (Figure  
298 5F and Supp Figure 6B'). Hence, the initial cell elongation and consequent tissue  
299 elongation should be rescued if it depends on anisotropic stress that emerges from the  
300 hinge constriction. Since the tissue is shorter in both cases of genetic perturbation of  
301 microtubule organization (Figure 5G and Supp Figure 6B), these results provide direct  
302 experimental evidence that initial cell elongation is independent of extrinsic forces.



## 303 **Discussion**

304 Previous studies established that microtubules contribute to cell shape changes (Singh  
305 et al., 2018, Takeda et al., 2018, Picone et al., 2010). Our observations expand this  
306 view, showing that microtubules, which are patterned along the proximal-distal axis by  
307 the Ft-PCP signaling pathway, generate protrusive forces that initiate cell elongation  
308 required for wing tissue extension. Upon polarization, actomyosin contractility further  
309 narrows these cells. Collectively, our work fills a critical gap on the interplay between  
310 local microtubule and actomyosin-generated forces during wing elongation. As  
311 depletion of MyosinII leads to the isotropic junctional tension and cell pre-stress  
312 release, it argues against the presence of additional polarized contractile force in wing  
313 cells. Consistently, downregulation of Dachs and MyosinVI, two atypical myosins  
314 previously associated with junctional remodeling (Bosveld et al., 2012, Lin et al., 2007),  
315 does not affect wing shape (Supp Figure 5B).

316 We further find that the patterning of non-centrosomal microtubules is  
317 independent of mechanical or geometrical cues. Cell shape was proposed to play a  
318 critical role in aligning non-centrosomal microtubules in the fly epithelium (Gomez et  
319 al., 2016). Considering their stiffness and angular dependency on catastrophe,  
320 growing microtubules could self-organize into a network controlled by the elongated  
321 cell shape (Picone et al., 2010, Mirabet et al., 2018). Given the changes in cell shape  
322 observed upon myosin inhibition, it is thus plausible to envision that actomyosin  
323 contraction acts upstream of microtubules to initiate cell elongation. However, our data  
324 revealed that despite cells becoming rounder, the alignment of microtubules along the  
325 proximal-distal axis in MyosinII depleted cells is not perturbed (Figure 2C',E). Hence,  
326 our data support the notion that cell elongation is not the cause but the consequence  
327 of polarized alignment of microtubules via the Fat-PCP signaling pathway. Indeed,  
328 failure to pattern apical microtubule cytoskeleton upon loss of the microtubule minus-  
329 end binding protein Patronin, which is required for the correct organization of non-  
330 centrosomal microtubules in wing epithelial cell, results in shorter cells and tissue.

331

332 In summary, our results refine the current view on wing epithelium development,  
333 showing that a combination of local opposing forces drives cell elongation. We  
334 consider the identified mechanism to be complemented by additional regulatory  
335 circuits that jointly control cell and tissue shape changes during wing development.  
336 Notably this model is consistent with published data showing that extrinsic mechanical

337 forces act during the late phase of wing reshaping starting after 18 hAPF, when the  
338 extracellular matrix protein Dumpy becomes patterned at the wing margin (Ray et al.,  
339 2015, Etournay et al., 2015). Most importantly, our findings also have implications for  
340 planar cell polarity. Ft-PCP signaling pathway, which coordinates planar polarization  
341 of cells within the tissue plane during various morphogenetic processes in  
342 invertebrates and vertebrates, is highly conserved. Considering that aberrant PCP  
343 signaling yields a failure of tissue elongation, which leads to many developmental  
344 anomalies such as body truncation and neural tube defects, we propose that  
345 microtubules and actin cytoskeleton play an important role in shaping cells during  
346 development and homeostasis. In the future, it will thus be critical to elucidate the  
347 mechanical interplay of microtubules and actomyosin and its dependency on PCP  
348 signaling in other biological contexts.



## 349 **Materials and Methods**

350

### 351 **Drosophila Melanogaster**

352 The following mutant and transgenic fly strains were used in this study: *w<sup>1118</sup>* (BDSC  
353 3605), *arm-Arm-GFP* (BDSC 3605), *sqh<sup>AX3</sup>; sqh-Sqh-GFP* (BDSC 57144), *ciGal4*,  
354 *tubGal4* (BDSC 5138), *tubGal80<sup>ts</sup>* (BDSC 7019), *nubGal4* (BDSC 86108), *d<sup>1</sup>* (BDSC  
355 270), *d<sup>GC13</sup>* (BDSC 6389), *dp<sup>ov1</sup>* (BDSC 276), *ft<sup>GRV</sup>* (BDSC 1894), *ft<sup>(2)fd</sup>* (BDSC 1894),  
356 *Patronin* RNAi (BDSC 36659) stocks from BDSC, *MyosinVI* RNAi stock from VDRC  
357 (VDRC 37534), *UAS-NSImb-vhhGFP4* (*UAS-deGradFP* construct) from D. Brunner,  
358 *UAS-GFP-DN-Zip* from D. Kiehart, *UAS-FtΔECDΔN1* from S. Blair. All fly stocks were  
359 raised at 25°C (unless otherwise mentioned) and grown on standard cornmeal-agar  
360 medium. The stocks are listed in Flybase ([www.flybase.org](http://www.flybase.org)).

361

### 362 **deGradFP expression and standardization of dual temperature regime**

363 Continuous expression of deGradFP at 25°C was lethal for the embryos and did not  
364 allow the growth until the desired stages of development. Therefore, in order to disrupt  
365 MyosinII contractility during the desired stages of pupal wing development, deGradFP  
366 was required to be expressed in a temporally controlled way using *ciGal4* driver and  
367 *tubGal80<sup>ts</sup>* system at a combination of 18°C and 29°C. The different time regimes of  
368 dual temperature were established in order to get the desired developmental stages  
369 where the role of MyosinII contractility was analyzed. The different dual temperature  
370 regimes, their equivalent developmental stages and the assays done using those  
371 regimes are summarized in Table 1 (Supplemental information).

372

### 373 **Adult wing preparation**

374 Wings from the adult flies were dissected and mounted on a glass slide in Canada  
375 balsam (Sigma-Aldrich) mixed with a tiny drop of absolute ethanol.

376

### 377 **Immunohistochemistry**

378 White pre-pupae were collected at 0 hAPF from desired stocks and crosses growing  
379 either at 18°C (for all deGradFP sets of experiments) or 25°C (for all sets of  
380 experiments other than deGradFP). The pre-pupae collected at 0 hAPF were then

381 either shifted to 29°C (for all tubGal80<sup>ts</sup> set of experiments) or grown at 25°C (for all  
382 set of experiments other than tubGal80<sup>ts</sup>) until the final desired developmental stages  
383 were reached. The pupae were then fixed for 6-8 hours in 4 % PFA (with 0.1% Triton  
384 X-100) at room temperature. Wings were dissected and washed thoroughly with PBT  
385 (PBS + 0.1% Triton X-100) 2-3 times. Immunostaining was performed using standard  
386 protocols (Matis et al., 2014) with minor modifications. Primary antibody (or antibody  
387 cocktail with appropriate antibody dilution) was first diluted in PBTB (PBS + 0.1% Triton  
388 X-100 + 2% of BSA) and then added to the wings. The wings were then incubated  
389 overnight (~16 hours) at 4°C on a rotor. After three washes using PBT secondary  
390 antibody diluted in PBTB was added to the wings. Wings were incubated for 2 hours  
391 at room temperature and washed three times in PBT. Finally, wings were mounted on  
392 glass slides in Vectashield with or without DAPI (Vector Laboratories) and covered with  
393 coverslips.

394 For immunofluorescence staining with pMRLC, pupae were fixed for 1 hour in 18%  
395 PFA (with 0.1% Triton X-100) at room temperature. Wings were dissected and washed  
396 in PBT (PBS, 0.3% Triton X-100) for 3 times (10min each) followed by blocking for 1  
397 hour with PBTB (PBS, 0.3% Triton X-100, 0.5% BSA) and incubated overnight in  
398 primary antibody cocktail (in PBTB) at 4°C. Wings were washed 4 times (10 min each)  
399 using PBT. Wings were then incubated in a fluorescently conjugated secondary  
400 antibody cocktail (in PBTB, for 2 hours, at room temperature) and were washed 3 times  
401 (20 min each) with PBT before mounting on glass slides in Vectashield with DAPI.

402 The following primary antibodies were used: rabbit anti- $\alpha$ -tubulin (1:200; ab18251,  
403 Abcam); mouse anti-armadillo (1:100; N2 7A1, DSHB); mouse anti-flamingo (1:100;  
404 DSHB); and rabbit anti-pMRLC (1:50; 3671S, Cell Signaling Technology). Rhodamine  
405 phalloidin dye (1:100; Invitrogen) was used for visualizing pre-hair orientation.  
406 Fluorophore-conjugated secondary antibodies (Invitrogen) were used at 1:200 dilution.

407

#### 408 **Imaging of pupal wing**

409 Fixed and stained wings were imaged using an upright LSM 710 Confocal microscope  
410 (Carl Zeiss). The images were acquired using Zen software (Carl Zeiss, version 6.0,  
411 2010) at different high magnification objectives for different experiments depending on  
412 the resolution required. In general, 5x (0.16 EC Plan-Neofluar, Carl Zeiss) was used  
413 for all low magnification images to visualize whole wing morphology and determine the

414 landmarks for precise identification of developmental stages. For high magnification  
415 images, 40x (1.3 Oil C Plan-Apochromat, Carl Zeiss), 63x (1.4 Oil Plan-Apochromat,  
416 Carl Zeiss) and 100x (1.46 Oil  $\alpha$ -Plan-Apochromat, Carl Zeiss) objectives were used.  
417 All high magnification images were acquired at a step size of 0.3  $\mu\text{m}$  (unless otherwise  
418 mentioned).

419

## 420 **Imaging of adult wing**

421 Adult wings were imaged using Imager.M1 microscope (Carl Zeiss) equipped with  
422 CoolSNAP ES2 camera (Photometrics) using 10x objective (0.3 EC Plan-Neofluar,  
423 Carl Zeiss).

424

## 425 **Transmission Electron Microscopy (TEM).**

426 For TEM analysis, pupal wings of the appropriate age were fixed overnight at RT in a  
427 mixture of 2,5% glutaraldehyde in phosphate buffer (pH 7.3) and were further  
428 processed as described previously (Singh et al., 2018).

429

## 430 **Laser ablation**

431 Pupae of desired genotypes and developmental stage corresponding to 18 hAPF were  
432 collected and the cuticle was gently removed to get the pupae out of their pupal cases.  
433 The pupae were placed laterally on a coverslip smeared with a very thin layer of glue  
434 placed on top of a glass slide with spacers. The pupae expressed Arm-GFP or Sqh-  
435 GFP to visualize cell junctions and actomyosin cables for ablation, respectively. A  
436 single-pulse of 355 nm laser (DPSL-355/14, Rapp OptoElectronics) at 2% laser power  
437 was used across a 10-pixel (0.64  $\mu\text{m}$ ) line perpendicular either to the center of cell  
438 junctions (aligned along proximal-distal and anterior-posterior axes) or to the center of  
439 Myosin cable for ablation. Time-lapse 2D images with a frame rate of 100 ms were  
440 acquired using a 100x objective (1.46 NA Oil  $\alpha$ -Plan-Apochromat, Carl Zeiss) mounted  
441 on an upright AxioImager.M2 microscope (Carl Zeiss) equipped with CSU10B spinning  
442 disk (Yokogawa) and an sCMOS ORCA Flash 4.0LT system (Hamamatsu). Images  
443 were acquired using VisiView software (Visitron Systems GmbH) from at least 1 minute  
444 prior to ablation and up to 4 to 5 minutes post ablation to visualize the movement of  
445 cell junctions, vertices and MyosinII cables before and after nano-ablation.

446 For laser-induced hinge ablation, a single-pulse of 355 nm laser (DPSL-355/14, Rapp  
447 OptoElectronics) at 2% laser power was used to ablate the hinge of one of the wings  
448 (roughly near the hinge-blade border) using a line ROI along its entire width such that  
449 the cells in the blade were mechanically uncoupled to the hinge. Time-lapse images at  
450 a time interval of 5 min between the frames were acquired using a 40x (1.3 NA Oil C  
451 Plan-Apochromat, Carl Zeiss) objective. Images were acquired from at least 5-10 min  
452 prior to ablation till the end of hexagonal packing corresponding to 26 hAPF in order to  
453 visualize cell elongation (at an early stage) within minutes of hinge ablation and  
454 hexagonal packing of the cells (at a late stage) upon hinge ablation.

455

### 456 **Image Processing**

457 Images were processed and analyzed using Fiji/ImageJ software (NIH, version 2.0.0,  
458 2015). Images of pupal and adult wings acquired in parts were stitched into whole  
459 wings using the Fiji plugin “pairwise stitching”. For all the analyses related to apical cell  
460 shape, microtubule orientation, pMRLC signal intensity and apical area, only the apical  
461 slices at the level of adherens junctions were z projected. The z-slices at the level of  
462 adherens junctions in different images were determined by signals from Arm-GFP,  
463 anti-Armadillo antibody, anti- $\alpha$ -Tubulin antibody, anti-pMRLC antibody and Sqh-GFP.  
464 All the measurements were done in Fiji using the “Analyze” feature. Brightness and  
465 contrast were adjusted within the linear range wherever needed. If used, the median  
466 filter of 0.5 or 1.0 was applied to all the images in a given set of analyses. The whole  
467 wing images were cropped in Fiji to represent appropriate ROIs wherever needed.  
468 Appropriate and desired fluorophore channels were merged or split from multi-channel  
469 images for representation as required. Images were also converted into greyscale  
470 wherever needed for representation.

471

### 472 **Quantitative analyses**

473 Images processed in Fiji were used for quantitative analyses. Measurements were  
474 done in Fiji from the ROIs drawn manually for various parameters. All the raw  
475 measurements from Fiji were then summarized and further computed. The different  
476 ROIs taken from wings for all the measurements are marked in respective figure panels  
477 in the low magnification whole wing images. The total number of ‘n’ and ‘N’ analyzed

478 for the measurements in different experiments are mentioned in the associated figure  
479 legends.

480

#### 481 **Quantification of cell length**

482 ROIs were drawn manually by tracing the apical cell outlines marked by Arm-GFP or  
483 anti-Armadillo antibody signals. “Feret’s diameter,” a Fiji function, was used to measure  
484 the length of cells.

485

#### 486 **Quantification of wing length**

487 ROIs were drawn manually between the anterior crossvein (ACV) and the end of the  
488 longitudinal L3 vein, as shown in Figure 3D. The length was measured using Fiji  
489 function “Analyze >> Area”.

490

#### 491 **Quantification of cell area**

492 ROIs were drawn manually by tracing the apical cell outlines marked by Arm-GFP or  
493 anti-Armadillo antibody signals. The area was measured in square microns ( $\mu\text{m}^2$ ) using  
494 Fiji function “Analyze >> Area”.

495

#### 496 **Quantification of pupal vein area**

497 The images of the whole pupal wing were z-projected at the level of maximum cross-  
498 sectional vein area. ROIs were drawn manually by tracing the edges around the vein  
499 L2. The area was measured in square microns ( $\mu\text{m}^2$ ) using the Fiji function “Analyze  
500 >> Area”.

501

#### 502 **Quantification of displacement and recoil velocity of junctions upon laser 503 ablation**

504 The movement of vertices associated with the ablated junctions was tracked post-  
505 ablation manually for 2 seconds at an interval of 200 milliseconds. The displacement  
506 was calculated by the distance between the two vertices at every 200 milliseconds  
507 over the period of 2 seconds. This was represented as displacement-time graph with

508 mean and error values for total of 10 measurements at every 200 milliseconds. Recoil  
509 velocity was calculated for the initial 200 milliseconds (in the linear range) by dividing  
510 initial displacement over the first 200 milliseconds. This initial recoil velocity was used  
511 as a proxy measurement for junction tension.

512

### 513 **Quantification of percentage angular distribution of microtubules**

514 Appropriate apical slices were z projected. All the wings were aligned along their  
515 proximal-distal axis. Angular or polarized distribution of microtubules was measured  
516 by the Fiji plugin “Orientation J”. Microtubule orientation from different wings of same  
517 genotypes were pooled together and binned into 3 categories of angular distribution  
518 (0-30°, 30-60° and 60-90°) with the proximal-distal axis. The mean population of  
519 microtubules oriented across the three categories were compared.

520

### 521 **Quantification of pMRLC polarity and intensity along the junctions**

522 Appropriate apical slices were z projected. All the wings were aligned along their  
523 proximal-distal axis. Polarization of pMRLC was measured by the Fiji plugin  
524 “Orientation J”. pMRLC orientations were pooled together and binned into 3 categories  
525 of angular distribution (0-30°, 30-60° and 60-90°) with the proximal-distal axis. The  
526 mean population of binned categories were compared. The quantification of the  
527 junctional pMRLC intensity was done by measuring the mean intensity of a 3 pixel-  
528 thick line (corresponds to 400 nm-wide stripe) using the Fiji linear ROI function along  
529 the junctions that were visualized by Arm staining. The background signal was  
530 subtracted from each of the intensity signals. Then the intensity values along each  
531 junction were normalized in respect with the average intensity signal of the control  
532 junctions in the same image (junctions on the posterior site of the wing).

533

### 534 **Quantification of cell shape (circularity)**

535 ROIs were drawn manually by tracing the apical cell outlines using Arm-GFP or anti-  
536 Armadillo antibody signals. Cell circularity was measured using the Fiji function “Shape  
537 descriptors”. Cell circularity is a measure of how close a cell is to being a perfect circle  
538 (circularity = 1). Mean cell circularity for many cells was computed and compared  
539 across different genotypes.

540 The formula for circularity is as follows:

541

$$542 \quad \text{Circularity} = \frac{4\pi \text{Area}}{(\text{perimeter})^2}$$

543

### 544 **Computational model of actomyosin-microtubule force balance**

545 The model was originally used to model cell motility by actomyosin contractile stress  
546 (Marth et al., 2015). Here, we adopt the approach to model active forces generated by  
547 the microtubules (Figure 3A). The cell is modeled as an active polar gel surrounded by  
548 a membrane that separates it from the surrounding extracellular fluid. The model uses  
549 a diffuse interface description of the cell, i.e., the cell is modeled by the phase-field  
550 parameter  $\phi$  that takes on the value 1 inside the cell and -1 outside with a smooth  
551 transition in the interface region. The cell membrane is implicitly defined as the region  
552 where  $\phi = 0$ . The average orientation of the microtubules is tracked by the vector-  
553 valued orientation field  $P$ . Note that  $P$  only represents the average direction of  
554 microtubules, not a microtubule density or the strength of the local pushing force.  
555 Hence, the model (weakly) enforces unit length  $|P| = 1$  for the orientation field vectors  
556 inside the cell and ensures that the orientation field vanishes ( $|P| = 0$ ) outside the  
557 cell, with a smooth transition in the interface region. For the fluid, we track the velocity  
558  $u$  and the pressure  $p$  using the Stokes equations. For simplicity, we assume equal  
559 density for the cytoplasm and the extracellular fluid.

560 The model equations are obtained by assuming that the system evolves according to  
561 a gradient descent of the free energy

$$562 \quad E(\phi, P, u) = E_{kin}(u) + E_S(\phi) + E_P(\phi, P)$$

563

564 which is composed of the kinetic energy of the fluid, the membrane energy  $E_S$  and the  
565 energy of the microtubule network  $E_P$ . The membrane energy consists of Helfrich-type  
566 bending energy (Helfrich, 1973) and the surface energy

$$567 \quad \frac{1}{Ca} \int_X \frac{\epsilon}{2} |\nabla\phi|^2 + \frac{1}{\epsilon} W(\phi) dx$$

568 corresponding to a classic Cahn-Hilliard model (Cahn and Hilliard, 1958, Cahn and  
569 Hilliard, 1959). Here,  $\epsilon$  is the phase-field parameter describing the thickness of the



570 interface region and  $W$  is a double-well potential with minima at -1 and 1. The capillary  
571 number  $Ca$  regulates the strength of the surface tension (higher values of  $Ca$  model  
572 lower surface tension). The bending resistance is controlled by the parameter  $Be$ .

573 The cell (phase field) and the microtubules are advected with the fluid flow and appear  
574 as additional stress terms in the Stokes equation. In particular, the protrusive force of  
575 the microtubules enters via the active stress term

$$576 \quad \frac{1}{Fa} \tilde{\phi} P \otimes P$$

577 where  $\tilde{\phi} = \frac{1}{2}(\phi + 1)$  is an indicator function for the cell interior and the (negative)  
578 active force number  $Fa$  controls the strength of the protrusive force (higher absolute  
579 value of  $Fa$  means lower protrusive force). In our simulations, we keep  $Be$  fixed and  
580 only vary  $Ca$  and  $Fa$ , i.e., we assume a fixed bending resistance and model the  
581 actomyosin forces through the surface tension.

582 The resulting coupled non-linear system of partial differential equations (PDEs) is  
583 solved using our discretization module `dune-gdt` (<https://zivgitlab.uni-muenster.de/ag-ohlberger/dune-community/dune-xt/-/blob/master/README.md>) based on the  
584 software framework DUNE (Bastian et al., 2021). For a detailed description of the  
585 model and the numerical approach, see (Leibner et al., 2021).

587

## 588 **Statistical analyses**

589 All the datasets presented in this work were first tested for normal distribution using  
590 D'Agostino & Pearson test or Shapiro-Wilk normality tests. Statistical significance was  
591 determined using two-tailed Unpaired/Student's t-test or ordinary one-way ANOVA  
592 (with Tukey's multiple comparisons) when the data were distributed normally for two  
593 or more than two groups, respectively. Two-tailed Mann-Whitney U-test or Kruskal-  
594 Wallis test (with Dunn's multiple comparisons) were performed when datasets were  
595 not distributed normally. All the graphs with scatter dot plots show mean values with  
596 red lines. Boxes in all box plots extend from the 25<sup>th</sup> to 75<sup>th</sup> percentiles, with a line at  
597 the median. Whiskers show min and max values. All the bar graphs indicate mean  $\pm$   
598 sd. The significance levels in all the graphs are as follows; n.s. (non-significant), \* ( $p \leq$   
599 0.05), \*\* ( $p \leq 0.01$ ), \*\*\* ( $p \leq 0.001$ ) and \*\*\*\* ( $p \leq 0.0001$ ). The statistical tests were  
600 performed using Prism7 (version 7.0d for Mac OS X, GraphPad Software). All  
601 experiments presented in the manuscript were repeated at least in three independent



602 experiments/biological replicates. The experiments were not randomized, and the  
603 sample size was not predetermined.

604

### 605 **Data and code availability**

606 All data are available in the main text or the supplementary materials. Code generated  
607 for this study is available from the corresponding author without restriction.

608

### 609 **Acknowledgments**

610 We thank Damian Brunner, Daniel P. Kiehart, Seth S. Blair, the Bloomington Stock  
611 Center and the Developmental Studies Hybridoma Bank, for providing fly stocks and  
612 antibodies; Matis lab members for critical reading of the manuscript. This work was  
613 supported by the Cells-in-Motion Cluster of Excellence EXC-1003 (FF-2015-07) and  
614 the Deutsche Forschungsgemeinschaft (DFG, SPP-1782, MA 6726/3-1) to M.M., by  
615 the DFG under Germany's Excellence Strategy EXC 1003 FF-2015-07 and EXC 2044  
616 – 390685587, Mathematics Münster: Dynamics–Geometry–Structure to T.L. and M.O.

617

### 618 **Competing interests**

619 The authors declare no competing or financial interests.

620

### 621 **Author Contribution**

622 A.S. designed, performed experiments and analyzed the data, and wrote the  
623 manuscript. S.T. performed the immunostaining experiments. A.R., H.N. and J.K.  
624 prepared and imaged TEM samples. T.L. and M.O. developed the model and carried  
625 out the simulation. M.M. supervised the research and wrote the manuscript with  
626 feedback from all authors.

## 627 References

- 628
- 629 AIGOUY, B., FARHADIFAR, R., STAPLE, D. B., SAGNER, A., ROPER, J. C.,  
630 JULICHER, F. & EATON, S. 2010. Cell flow reorients the axis of planar polarity in  
631 the wing epithelium of *Drosophila*. *Cell*, 142, 773-86.
- 632 ALT, S., GANGULY, P. & SALBREUX, G. 2017. Vertex models: from cell mechanics to  
633 tissue morphogenesis. *Philosophical Transactions of the Royal Society B-Biological  
634 Sciences*, 372.
- 635 BAENA-LOPEZ, L. A., BAONZA, A. & GARCIA-BELLIDO, A. 2005. The orientation of  
636 cell divisions determines the shape of *Drosophila* organs. *Current biology : CB*, 15,  
637 1640-4.
- 638 BARDET, P. L., GUIRAO, B., PAOLETTI, C., SERMAN, F., LEOPOLD, V., BOSVELD,  
639 F., GOYA, Y., MIROUSE, V., GRANER, F. & BELLAICHE, Y. 2013. PTEN  
640 controls junction lengthening and stability during cell rearrangement in epithelial  
641 tissue. *Dev Cell*, 25, 534-46.
- 642 BASTIAN, P., BLATT, M., DEDNER, A., DREIER, N. A., ENGWER, C., FRITZE, R.,  
643 GRASER, C., GRUNINGER, C., KEMPF, D., KLOFKORN, R., OHLBERGER, M.  
644 & SANDER, O. 2021. The DUNE framework: Basic concepts and recent  
645 developments. *Computers & Mathematics with Applications*, 81, 75-112.
- 646 BOSVELD, F., BONNET, I., GUIRAO, B., TLILI, S., WANG, Z., PETITALOT, A.,  
647 MARCHAND, R., BARDET, P. L., MARCQ, P., GRANER, F. & BELLAICHE, Y.  
648 2012. Mechanical control of morphogenesis by Fat/Dachsous/Four-jointed planar cell  
649 polarity pathway. *Science*, 336, 724-7.
- 650 BOUCHET, B. P. & AKHMANOVA, A. 2017. Microtubules in 3D cell motility. *J Cell Sci*,  
651 130, 39-50.
- 652 CAHN, J. W. & HILLIARD, J. E. 1958. Free Energy of a Nonuniform System .1. Interfacial  
653 Free Energy. *Journal of Chemical Physics*, 28, 258-267.
- 654 CAHN, J. W. & HILLIARD, J. E. 1959. Free Energy of a Nonuniform System .3. Nucleation  
655 in a 2-Component Incompressible Fluid. *Journal of Chemical Physics*, 31, 688-699.
- 656 CAUSSINUS, E., KANCA, O. & AFFOLTER, M. 2011. Fluorescent fusion protein knockout  
657 mediated by anti-GFP nanobody. *Nat Struct Mol Biol*, 19, 117-21.
- 658 CHEN, J., CASTELVECCHI, G. D., LI-VILLARREAL, N., RAUGHT, B., KREZEL, A. M.,  
659 MCNEILL, H. & SOLNICA-KREZEL, L. 2018. Atypical Cadherin Dachsous1b  
660 Interacts with Ttc28 and Aurora B to Control Microtubule Dynamics in Embryonic  
661 Cleavages. *Dev Cell*, 45, 376-391 e5.
- 662 CLARKE, D. N. & MARTIN, A. C. 2021. Actin-based force generation and cell adhesion in  
663 tissue morphogenesis. *Curr Biol*, 31, R667-R680.
- 664 CLASSEN, A. K., ANDERSON, K. I., MAROIS, E. & EATON, S. 2005. Hexagonal packing  
665 of *Drosophila* wing epithelial cells by the planar cell polarity pathway. *Developmental  
666 cell*, 9, 805-17.
- 667 COLLINET, C. & LECUIT, T. 2021. Programmed and self-organized flow of information  
668 during morphogenesis. *Nat Rev Mol Cell Biol*, 22, 245-265.
- 669 DURST, R., SAULS, K., PEAL, D. S., DEVLAMING, A., TOOMER, K., LEYNE, M.,  
670 SALANI, M., TALKOWSKI, M. E., BRAND, H., PERROCHEAU, M., SIMPSON,  
671 C., JETT, C., STONE, M. R., CHARLES, F., CHIANG, C., LYNCH, S. N.,  
672 BOUATIA-NAJI, N., DELLING, F. N., FREED, L. A., TRIBOUILLOY, C., LE  
673 TOURNEAU, T., LEMAREC, H., FERNANDEZ-FRIERA, L., SOLIS, J.,  
674 TRUJILLANO, D., OSSOWSKI, S., ESTIVILL, X., DINA, C., BRUNEVAL, P.,  
675 CHESTER, A., SCHOTT, J. J., IRVINE, K. D., MAO, Y., WESSELS, A.,  
676 MOTIWALA, T., PUCEAT, M., TSUKASAKI, Y., MENICK, D. R.,  
677 KASIGANESAN, H., NIE, X., BROOME, A. M., WILLIAMS, K., JOHNSON, A.,

- 678 MARKWALD, R. R., JEUNEMAITRE, X., HAGEGE, A., LEVINE, R. A., MILAN,  
679 D. J., NORRIS, R. A. & SLAUGENHAUPT, S. A. 2015. Mutations in DCHS1 cause  
680 mitral valve prolapse. *Nature*, 525, 109-13.
- 681 ETIENNE-MANNEVILLE, S. 2013. Microtubules in cell migration. *Annu Rev Cell Dev Biol*,  
682 29, 471-99.
- 683 ETOURNAY, R., POPOVIC, M., MERKEL, M., NANDI, A., BLASSE, C., AIGOUY, B.,  
684 BRANDL, H., MYERS, G., SALBREUX, G., JULICHER, F. & EATON, S. 2015.  
685 Interplay of cell dynamics and epithelial tension during morphogenesis of the  
686 *Drosophila* pupal wing. *Elife*, 4, e07090.
- 687 FAN, H. F. & LI, S. F. 2015. Modeling microtubule cytoskeleton via an active liquid crystal  
688 elastomer model. *Computational Materials Science*, 96, 559-566.
- 689 GILMOUR, D., REMBOLD, M. & LEPTIN, M. 2017. From morphogen to morphogenesis  
690 and back. *Nature*, 541, 311-320.
- 691 GOMEZ, J. M., CHUMAKOVA, L., BULGAKOVA, N. A. & BROWN, N. H. 2016.  
692 Microtubule organization is determined by the shape of epithelial cells. *Nat Commun*,  
693 7, 13172.
- 694 HARUMOTO, T., ITO, M., SHIMADA, Y., KOBAYASHI, T. J., UEDA, H. R., LU, B. &  
695 UEMURA, T. 2010. Atypical cadherins Dachous and Fat control dynamics of  
696 noncentrosomal microtubules in planar cell polarity. *Developmental cell*, 19, 389-401.
- 697 HEISENBERG, C. P. & BELLAICHE, Y. 2013. Forces in tissue morphogenesis and  
698 patterning. *Cell*, 153, 948-62.
- 699 HELFRICH, W. 1973. Elastic Properties of Lipid Bilayers - Theory and Possible  
700 Experiments. *Zeitschrift Fur Naturforschung C-a Journal of Biosciences*, C 28, 693-  
701 703.
- 702 IKEBE, M. & HARTSHORNE, D. J. 1985. Phosphorylation of smooth muscle myosin at two  
703 distinct sites by myosin light chain kinase. *J Biol Chem*, 260, 10027-31.
- 704 LEIBNER, T., MATIS, M., OHLBERGER, M. & RAVE, S. 2021. Distributed model order  
705 reduction of a model for microtubule-based cell polarization using HAPOD. *arXiv*  
706 *preprint arXiv:2111.00129*.
- 707 LI-VILLARREAL, N., FORBES, M. M., LOZA, A. J., CHEN, J., MA, T., HELDE, K.,  
708 MOENS, C. B., SHIN, J., SAWADA, A., HINDES, A. E., DUBRULLE, J., SCHIER,  
709 A. F., LONGMORE, G. D., MARLOW, F. L. & SOLNICA-KREZEL, L. 2015.  
710 Dachous1b cadherin regulates actin and microtubule cytoskeleton during early  
711 zebrafish embryogenesis. *Development*, 142, 2704-18.
- 712 LIN, H. P., CHEN, H. M., WEI, S. Y., CHEN, L. Y., CHANG, L. H., SUN, Y. J., HUANG,  
713 S. Y. & HSU, J. C. 2007. Cell adhesion molecule Echinoid associates with  
714 unconventional myosin VI/Jaguar motor to regulate cell morphology during dorsal  
715 closure in *Drosophila*. *Dev Biol*, 311, 423-33.
- 716 MA, D., YANG, C. H., MCNEILL, H., SIMON, M. A. & AXELROD, J. D. 2003. Fidelity in  
717 planar cell polarity signalling. *Nature*, 421, 543-7.
- 718 MAO, Y., KUTA, A., CRESPO-ENRIQUEZ, I., WHITING, D., MARTIN, T.,  
719 MULVANEY, J., IRVINE, K. D. & FRANCIS-WEST, P. 2016. Dchs1-Fat4  
720 regulation of polarized cell behaviours during skeletal morphogenesis. *Nat Commun*,  
721 7, 11469.
- 722 MAO, Y., MULVANEY, J., ZAKARIA, S., YU, T., MORGAN, K. M., ALLEN, S.,  
723 BASSON, M. A., FRANCIS-WEST, P. & IRVINE, K. D. 2011. Characterization of a  
724 Dchs1 mutant mouse reveals requirements for Dchs1-Fat4 signaling during  
725 mammalian development. *Development*, 138, 947-57.
- 726 MARTH, W., PRAETORIUS, S. & VOIGT, A. 2015. A mechanism for cell motility by  
727 active polar gels. *J R Soc Interface*, 12.
- 728 MATIS, M. 2020. The Mechanical Role of Microtubules in Tissue Remodeling. *Bioessays*,  
729 42, e1900244.

- 730 MATIS, M., RUSSLER-GERMAIN, D. A., HU, Q., TOMLIN, C. J. & AXELROD, J. D.  
731 2014. Microtubules provide directional information for core PCP function. *Elife*, 3,  
732 e02893.
- 733 MIRABET, V., KRUPINSKI, P., HAMANT, O., MEYEROWITZ, E. M., JONSSON, H. &  
734 BOUDAUD, A. 2018. The self-organization of plant microtubules inside the cell  
735 volume yields their cortical localization, stable alignment, and sensitivity to external  
736 cues. *PLoS Comput Biol*, 14, e1006011.
- 737 NASHCHEKIN, D., FERNANDES, A. R. & ST JOHNSTON, D. 2016. Patronin/Shot  
738 Cortical Foci Assemble the Noncentrosomal Microtubule Array that Specifies the  
739 Drosophila Anterior-Posterior Axis. *Dev Cell*, 38, 61-72.
- 740 NOORDSTRA, I., LIU, Q., NIJENHUIS, W., HUA, S., JIANG, K., BAARS, M.,  
741 REMMELZWAAL, S., MARTIN, M., KAPITEIN, L. C. & AKHMANOVA, A.  
742 2016. Control of apico-basal epithelial polarity by the microtubule minus-end-binding  
743 protein CAMSAP3 and spectraplakins ACF7. *J Cell Sci*, 129, 4278-4288.
- 744 OLOFSSON, J., SHARP, K. A., MATIS, M., CHO, B. & AXELROD, J. D. 2014.  
745 Prickle/spiny-legs isoforms control the polarity of the apical microtubule network in  
746 planar cell polarity. *Development*, 141, 2866-74.
- 747 PANZADE, S. & MATIS, M. 2021. The Microtubule Minus-End Binding Protein Patronin Is  
748 Required for the Epithelial Remodeling in the Drosophila Abdomen. *Front Cell Dev*  
749 *Biol*, 9, 682083.
- 750 PASAKARNIS, L., FREI, E., CAUSSINUS, E., AFFOLTER, M. & BRUNNER, D. 2016.  
751 Amnioserosa cell constriction but not epidermal actin cable tension autonomously  
752 drives dorsal closure. *Nat Cell Biol*, 18, 1161-1172.
- 753 PENTA, R., AMBROSI, D. & SHIPLEY, R. J. 2014. Effective Governing Equations for  
754 Poroelastic Growing Media. *Quarterly Journal of Mechanics and Applied*  
755 *Mathematics*, 67, 69-91.
- 756 PICONE, R., REN, X., IVANOVITCH, K. D., CLARKE, J. D., MCKENDRY, R. A. &  
757 BAUM, B. 2010. A polarised population of dynamic microtubules mediates  
758 homeostatic length control in animal cells. *PLoS Biol*, 8, e1000542.
- 759 PINHEIRO, D. & BELLAICHE, Y. 2018. Mechanical Force-Driven Adherens Junction  
760 Remodeling and Epithelial Dynamics. *Dev Cell*, 47, 3-19.
- 761 RAY, R. P., MATAMORO-VIDAL, A., RIBEIRO, P. S., TAPON, N., HOULE, D.,  
762 SALAZAR-CIUDAD, I. & THOMPSON, B. J. 2015. Patterned Anchorage to the  
763 Apical Extracellular Matrix Defines Tissue Shape in the Developing Appendages of  
764 Drosophila. *Dev Cell*, 34, 310-22.
- 765 SABURI, S., HESTER, I., FISCHER, E., PONTOGLIO, M., EREMINA, V., GESSLER, M.,  
766 QUAGGIN, S. E., HARRISON, R., MOUNT, R. & MCNEILL, H. 2008. Loss of Fat4  
767 disrupts PCP signaling and oriented cell division and leads to cystic kidney disease.  
768 *Nature genetics*, 40, 1010-5.
- 769 SINGH, A., SAHA, T., BEGEMANN, I., RICKER, A., NÜSSE, H., THORN-SESHOLD, O.,  
770 KLINGAUF, J., GALIC, M. & MATIS, M. 2018. Polarized Microtubule Dynamics  
771 Directs Cell Mechanics and Coordinates Forces during Epithelial Morphogenesis.  
772 *Nature Cell Biology*.
- 773 STEHBENS, S. & WITTMANN, T. 2012. Targeting and transport: how microtubules control  
774 focal adhesion dynamics. *J Cell Biol*, 198, 481-9.
- 775 SUGIMURA, K. & ISHIHARA, S. 2013. The mechanical anisotropy in a tissue promotes  
776 ordering in hexagonal cell packing. *Development*, 140, 4091-101.
- 777 TAKEDA, M., SAMI, M. M. & WANG, Y. C. 2018. A homeostatic apical microtubule  
778 network shortens cells for epithelial folding via a basal polarity shift. *Nat Cell Biol*,  
779 20, 36-45.
- 780 TOYA, M., KOBAYASHI, S., KAWASAKI, M., SHIOI, G., KANEKO, M., ISHIUCHI, T.,  
781 MISAKI, K., MENG, W. & TAKEICHI, M. 2016. CAMSAP3 orients the apical-to-

- 782 basal polarity of microtubule arrays in epithelial cells. *Proc Natl Acad Sci U S A*, 113,  
783 332-7.
- 784 VILLANO, J. L. & KATZ, F. N. 1995. four-jointed is required for intermediate growth in the  
785 proximal-distal axis in *Drosophila*. *Development*, 121, 2767-77.
- 786 YANG, C., AXELROD, J. D. & SIMON, M. A. 2002. Regulation of Frizzled by Fat-like  
787 Cadherins during Planar Polarity Signaling in the *Drosophila* Compound Eye. *Cell*,  
788 108, 675-88.
- 789 ZAKARIA, S., MAO, Y., KUTA, A., FERREIRA DE SOUSA, C., GAUFO, G. O.,  
790 MCNEILL, H., HINDGES, R., GUTHRIE, S., IRVINE, K. D. & FRANCIS-WEST,  
791 P. H. 2014. Regulation of neuronal migration by Dchs1-Fat4 planar cell polarity. *Curr*  
792 *Biol*, 24, 1620-7.
- 793 ZEIDLER, M. P., PERRIMON, N. & STRUTT, D. I. 2000. Multiple roles for four-jointed in  
794 planar polarity and limb patterning. *Developmental biology*, 228, 181-96.  
795

**Figure 1.** MyosinII is polarized during early pupal wing development.

(A) Representative images showing anterior compartment of Sqh-GFP male (top) and deGradFP male (lower). To get a developmental stage equivalent to 18 hAPF at 25°C, deGradFP wings were grown sequentially at 18°C and 29°C using the tub-Gal80<sup>ts</sup> system (see table S1). Wings are expressing Sqh-GFP and are stained for pMRLC and Arm. In wild-type flies (Sqh-GFP male), MyosinII and phosphomyosin show polarized distribution at junctions oriented along the proximal-distal axis. In deGradFP-expressing flies, Sqh-GFP and the phosphomyosin signal are lost from junctions. The remaining Sqh-GFP signal does not colocalize with the phosphomyosin staining. Images shown in (A) are representative of n=5 wings and N=3 independent experiments. Scale bars, 5 µm. (B) Quantification of recoil velocity upon laser ablation of P/D (0-30°) and A/P (30-60°) interfaces in 18 hAPF wild-type flies (two-tailed t-test with Welch's correction, \*\*\* p = 0.0007, n=12 junctions each and N=5 pupae). (C) Quantification of pMRLC polarity (Mann-Whitney test, \*\*\*\* p < 0.0001, n=450 cells and 4 pupae). (D) Images showing anterior-posterior border in control flies (Sqh-GFP male, top) and Sqh-GFP knockdown flies (deGradFP male, bottom) stained for Arm and pMRLC. In control flies, phosphomyosin localizes to the junctions in the anterior and posterior compartments. In the flies expressing deGradFP under *ci-Gal4* control, the phosphomyosin signal in the anterior compartment is lost compared to the wing's posterior site. The polarity of the pMRLC signal is color-coded using OrientationJ. Scale bar, 10 µm. (E) Quantification of displacement upon laser ablation for interfaces along the proximal-distal axis in Sqh-GFP and female deGradFP control flies (gray, light gray) and Sqh-GFP knockdown flies (deGradFP male, green). n =10 junctions and 4 pupae per genotype. Values on the graph show mean displacements. Error bars show sd. (F) Quantifications of mean intensities of pMRLC in anterior and posterior compartments for Sqh-GFP and female deGradFP control flies (gray, light gray) and Sqh-GFP knockdown flies (deGradFP male, green). (Kruskal-Wallis tests, from left to right: n.s. p > 0.9999, n.s. p > 0.9999, \*\*\*\* p < 0.0001, number of junctions for Sqh-GFP male (A)=90, (P)=77, deGradeFP female (A)=76, (P)=74 and for deGradFP male (A)=100, (P)=102 and 3-5 pupae per genotype). Boxes in the plot extend from the 25<sup>th</sup> to 75<sup>th</sup> percentiles, with a line at the median. Whiskers show min and max values.



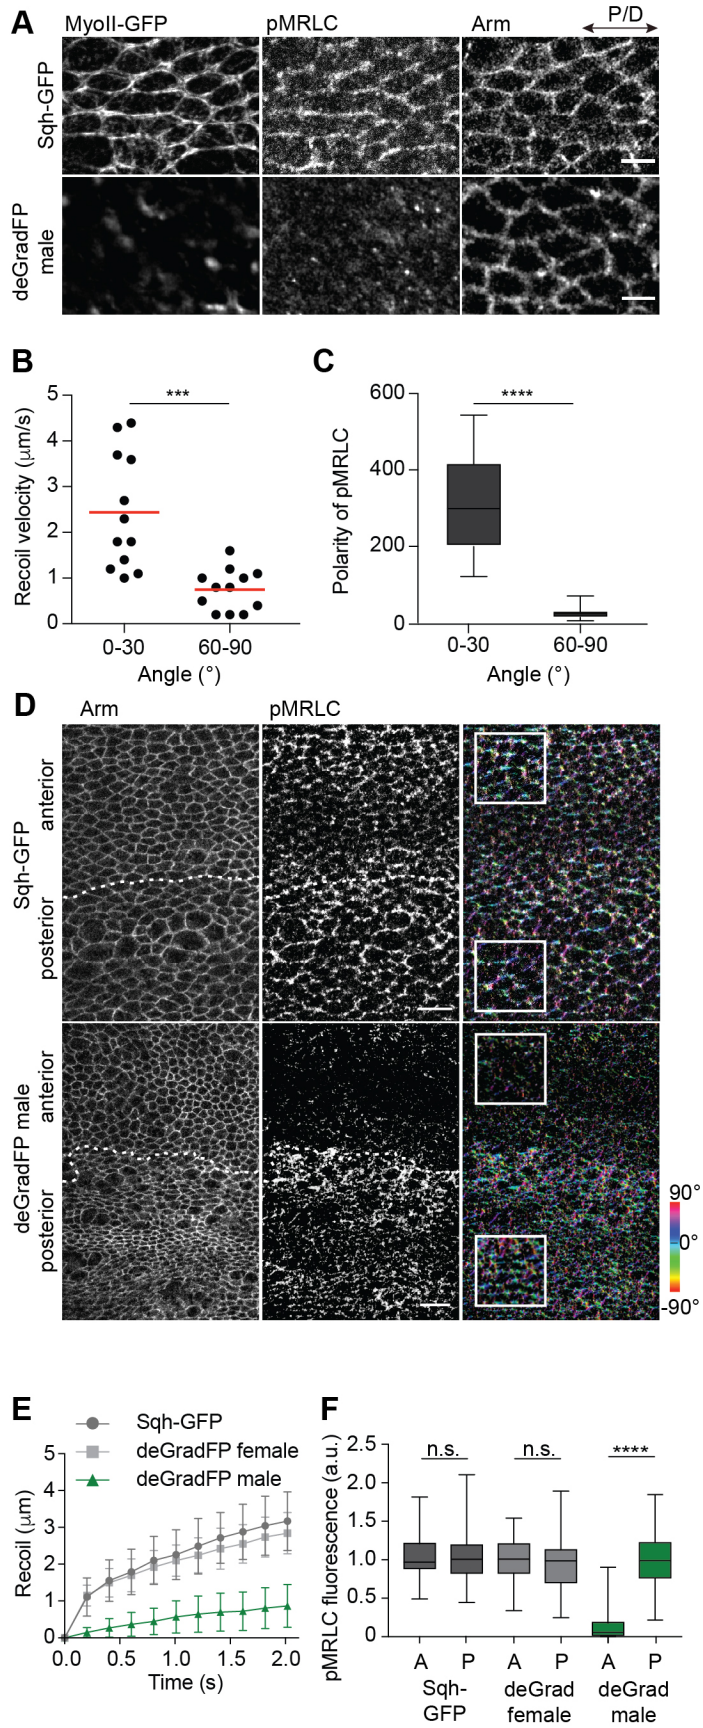

Singh et al  
Figure 1

**Figure 2.** Polarized alignment of apical microtubules is not disrupted by the loss of MyosinII activity.

(A) Force-balance model depicting the effect on cell shape/elongation upon disruption of MyosinII and microtubule forces. (B) Quantifications of cell length for different genotypes (Kruskal-Wallis test, n.s.  $p > 0.9999$ , \*\*\*\*  $p < 0.0001$ , \*\*\*\*  $p < 0.0001$ ,  $p < 0.0001$ , n(control/ Sqh-GFP male)=497 cells, n(deGradFP female)=250, n(deGradFP male)=250 and n(*ft-PCP*)=261 cells and 3-5 pupae per genotype). (C-C'') Images of 18 hAPF wings of Sqh-GFP male (C), deGradFP male (C') and *ft-PCP* (*ft<sup>(2)</sup>fd/ft<sup>GRV</sup>;tub-Gal4/UAS-Ft $\Delta$ ECD $\Delta$ N-1*, C'') stained for Arm and  $\alpha$ -Tub to visualize microtubules. Orientation of microtubules is color-coded using OrientationJ. Images shown are representative of 4 wings and 3 independent experiments. Scale bars, (C-C'') 5  $\mu$ m. (D) Quantification of microtubule alignment along proximal-distal axis for control flies (Sqh-GFP male and deGradFP female; gray, light gray) and deGradFP male (Kruskal-Wallis tests: n.s.  $p > 0.9999$ , n=80-100 cells and 3 pupae per genotype). (E) Quantifications of circularity for different genotypes. (Kruskal-Wallis tests from left to right: \*\*\*\*  $p < 0.0001$ , n.s.  $p > 0.9999$ , \*\*\*\*  $p < 0.0001$ , n(control)=250 cells, n(deGradFP female)=250 cells, n(deGradFP male)=250 cells and 3-5 pupae per genotype). Boxes in all plots extend from the 25<sup>th</sup> to 75<sup>th</sup> percentiles, with a line at the median. Whiskers show min and max values. (F) Quantifications of cell minor axis for different genotypes (Kruskal-Wallis tests from left to right: \*\*\*\*  $p < 0.0001$ , n.s.  $p > 0.9999$ , \*\*\*\*  $p < 0.0001$ , n(control)=250 cells, n(deGradFP female)=250 cells, n(deGradFP male)=250 cells and 3-5 pupae per genotype). (G) Cartoon showing the effect of disruption of MyosinII and microtubule activity on cell shape. The cell shape changes result from a general release of cellular pre-stress upon loss of MyosinII contractility, as suggested by an increase of length and width of the cell. Thus, indicating there is no direct relation between MyosinII polarized organization and cell elongation along the proximal-distal axis. However, MyosinII refines the overall cell shapes by (i) regulating the aspect ratio of the cells and (ii) by keeping the interfaces along proximal-distal axis taut and straight (indicated by black broken lines) as shown through the region of cell interfaces marked within the gray box (G, bottom).



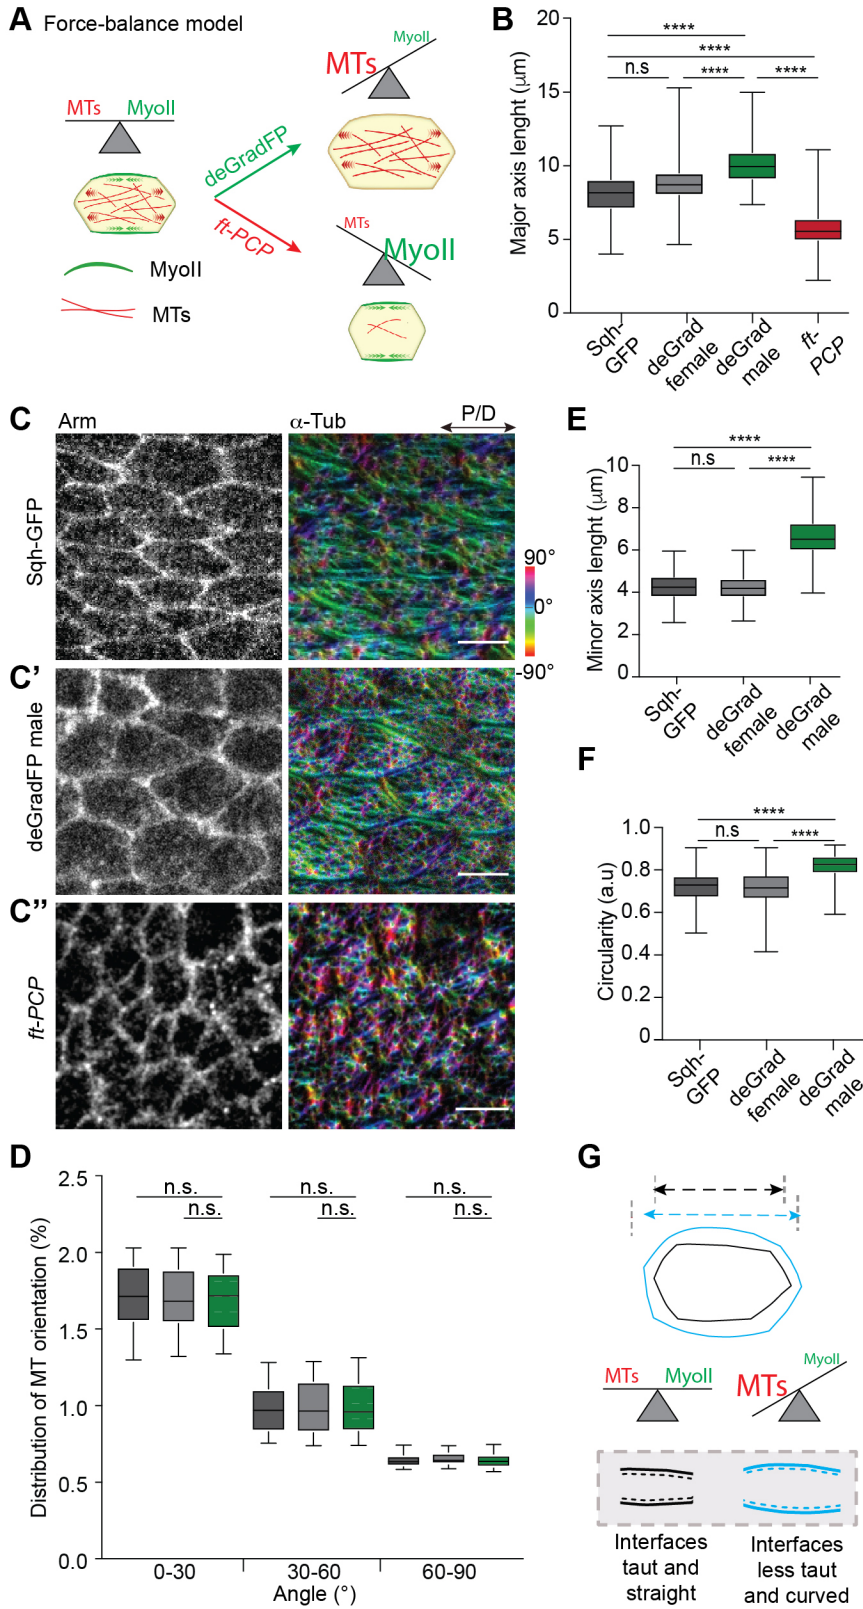

Singh et al  
Figure 2

**Figure 3.** Depletion of Patronin perturbs microtubule organization and leads to shorter cells and tissue.

(A) Images of 18 hAPF control (*nub-Gal4*; top) and Patronin depleted wings (*nub-Gal4>Patronin<sup>RNAi</sup>*; bottom) stained for Arm and  $\alpha$ -Tub to visualize microtubules. The orientation of microtubules is color-coded using OrientationJ. The images shown are representative of 4 wings and 3 independent experiments. Scale bars, 5  $\mu$ m. (B) Quantification of microtubule alignment along proximal-distal axis for control and Patronin depleted cells (Kruskal-Wallis tests, from left to right: \*\*\*\*  $p < 0.0001$ , \*\*\*\*  $p < 0.0001$ , \*\*\*\*  $p < 0.0001$ ,  $n=80-100$  cells and 3 pupae). (C) Quantifications of cell length. (Mann-Whitney test, \*\*\*\*  $p < 0.0001$ ,  $n(\text{control})=40$  cells,  $n(\textit{nub-Gal4>Patronin}^{\textit{RNAi}})=38$  cells and 3 pupae per genotype). Boxes in the plot extend from the 25<sup>th</sup> to 75<sup>th</sup> percentiles, with a line at the median. Whiskers show min and max values.

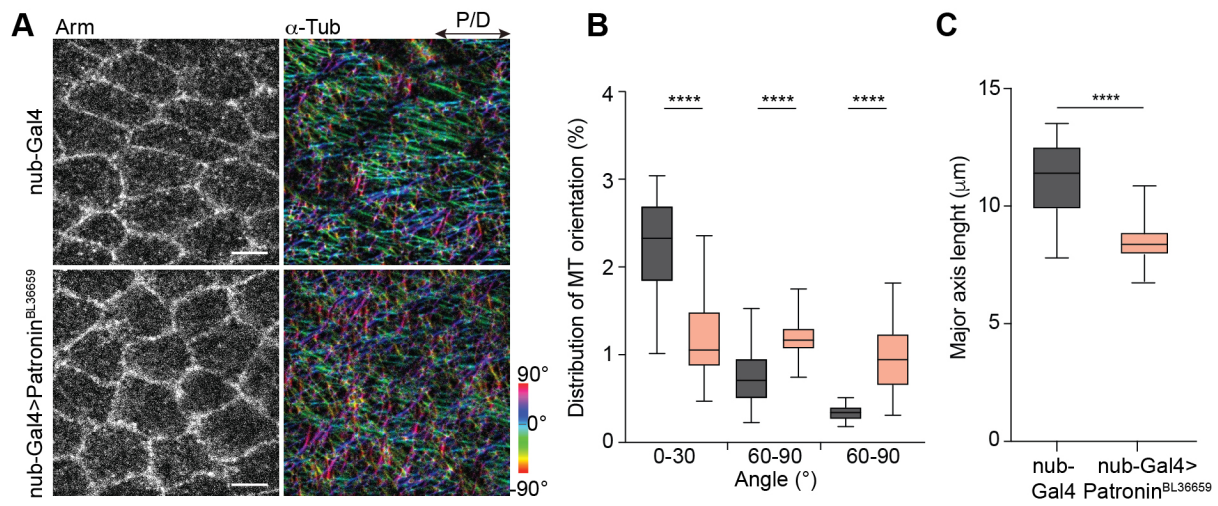

**Figure 4.** Computational verification of the force-balance hypothesis.

(A) Schematic description of the computational model. The cell is modeled by the phase field variable  $\phi$  that takes on the value 1 inside the cell (beige area) and -1 outside with a smooth transition in the interface region whose thickness is proportional to the parameter  $\epsilon$ . The cell membrane is implicitly defined as the region where  $\phi = 0$  (green line). The microtubules (bleached red lines in the background) are not tracked individually but only through the orientation field  $P$ , which gives the average microtubule direction at each point. The protrusive force of the microtubules is modeled by active stress in the direction of the orientation field (red arrows). The contractile myosin forces are modeled by the surface tension and bending forces (green arrows), which minimize the surface curvature and area. (B) Initially (at time  $t=0$ ), the cell is chosen to be elliptic with microtubules oriented in the proximal-distal (x) direction. (C) Cell shape at steady state (time  $t = 5$ ) for counteracting protrusive and contractile (surface tension) forces. The computational parameters were chosen as  $F_a = -1$  and  $C_a = 0.1$ . For this choice of parameters, the cell approximately maintains its shape, indicating a force balance. (D) If the protrusive force is reduced ( $F_a = -10$ ,  $C_a = 0.1$ ), the cell is significantly shorter in the proximal-distal direction at a steady state. (E) If the surface tension is reduced instead ( $F_a = -1$ ,  $C_a = 1$ ), the cell is significantly elongated at a steady state. The color bar shows the value of phase-field parameter  $\phi$ , turquoise arrows represent orientation field  $P$  (average microtubule orientation). The white line indicates the cell membrane (zero level set of  $\phi$ ).

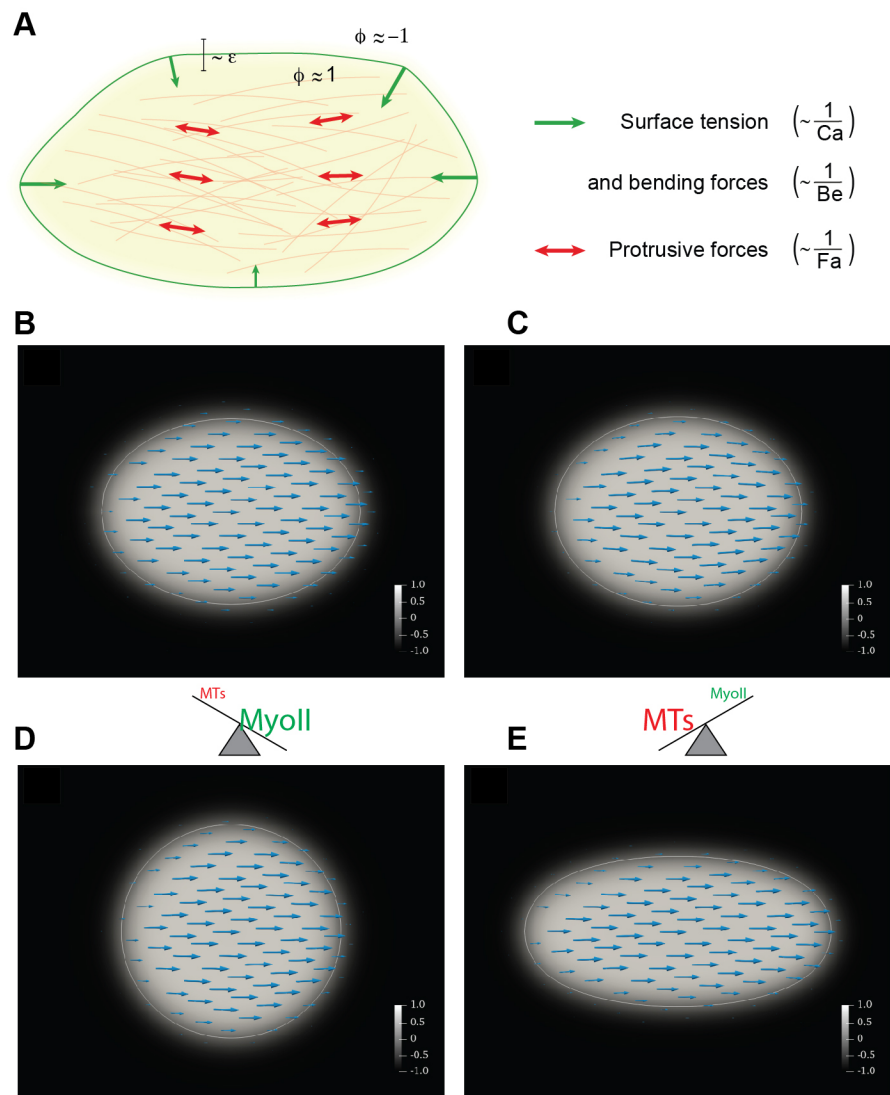

*Singh et al*  
Figure 4

**Figure 5.** Cell shape changes affect tissue shape.

(A) Comparison of *wild-type* (Sqh-GFP male), deGradFP male, and *ft-PCP* ( $ft^{(2)fd/ft^{GRV};tub-Gal4/UAS-Ft\Delta ECD\Delta N-1}$ ) mutant wings at 18 hAPF. (B) Graph showing quantification of anterior and posterior wing lengths in the deGradFP male marked as indicated by red lines in (A) (Two-tailed paired t-test, \*\*  $p = 0.0063$ ,  $n=6$  wings and 6 pupae). Graph show scatters dot plots with the red line indicating the mean. (C) Representative images of 18 hAPF *wild-type* ( $w^{1118}$ ) wings (top) and *ft-PCP* (bottom) stained for pMRLC and Arm. (D) Quantification of pMRLC polarity in *ft-PCP* ( $ft^{(2)fd/ft^{GRV};tub-Gal4/UAS-Ft\Delta ECD\Delta N-1}$ ) wings (Mann-Whitney test, \*\*\*\*  $p < 0.0001$ ,  $n=320$  cells and 3 pupae). (E) Quantifications of mean intensities of pMRLC in *wild-type* ( $w^{1118}$ ) and *ft-PCP* ( $ft^{(2)fd/ft^{GRV};tub-Gal4/UAS-Ft\Delta ECD\Delta N-1}$ ) wings (Mann-Whitney test, n.s.  $p > 0.5360$ ,  $n(w^{1118})=120$  and  $n(ft-PCP)=94$  junctions and 3-5 pupae per genotype). (F) Representative images of control (*nub-Gal4*) and *Patronin* (*nub-Gal4>Patronin<sup>RNAi</sup>*) depleted adult wings. (G) Graph showing quantification of wing lengths marked as indicated by the red line in (D) (Mann-Whitney test, \*\*  $p = 0.0040$ ,  $n(nub-Gal4)=8$  and  $n(nub-Gal4>Patronin^{RNAi})=4$  wings). Graph show scatters dot plots with the red line indicating the mean. Scale bars, (A) 50  $\mu\text{m}$ , and (C) 5  $\mu\text{m}$ .

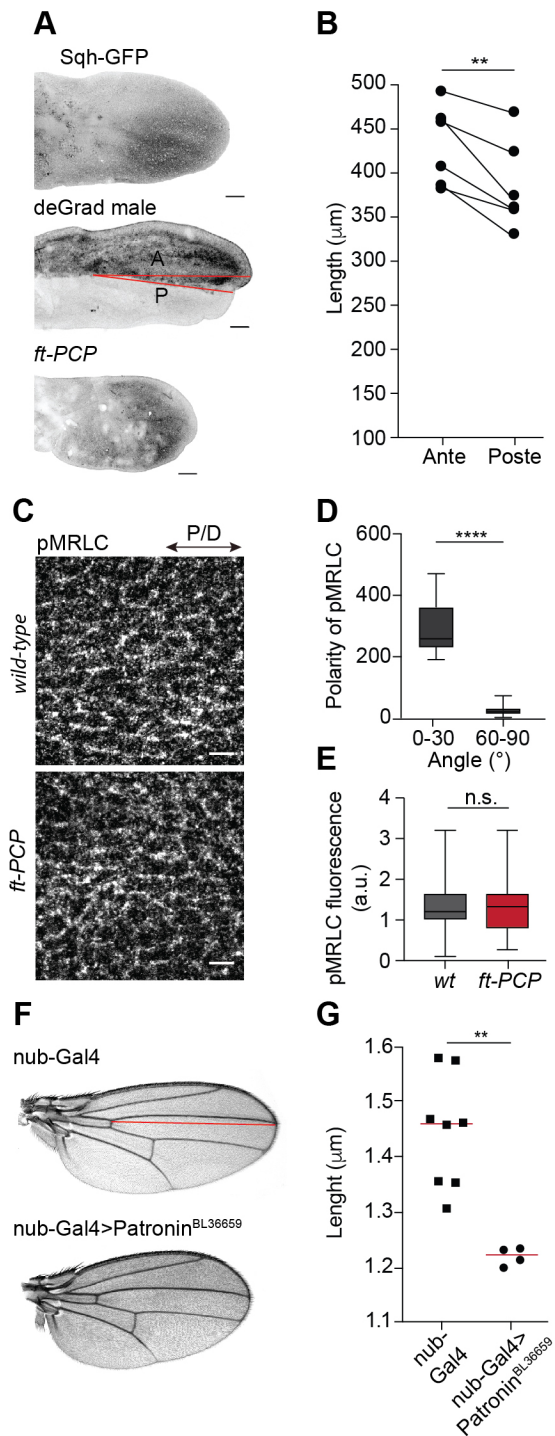



**Figure 6.** Initial wing cell elongation is independent of extrinsic forces.

(A) Representative images of 18 hAPF wings expressing Arm-GFP 5 minutes before and after hinge cut (10, 30, 45, 60 minutes). The orange star marks the cell that will divide. (A') Time-lapse images of the cell marked with the white asterisk in the (A). Note that the length of the cell does not change significantly after hinge ablation. Red dotted line marks left and right borders of the cell in the first frame. (B) Quantification of the cell length in 18 hAPF wings before hinge cut and after 60 minutes. (Two-tailed t-test, n.s.  $p > 0.1683$ ,  $n(\text{pre-cut})=136$  and  $n(\text{after cut})=125$  cells and 3-5 pupae per genotype). (C) Cartoon showing a cross-section of the wing around 16 hAPF. (D) TEM micrograph showing a cross-section of 16 hAPF *wild-type* ( $w^{1118}$ ) wing. Note that the overlying cuticle (black arrowhead) is fully detached from the epithelium apical surface (black arrow). Boxes in all plots extend from the 25<sup>th</sup> to 75<sup>th</sup> percentiles, with a line at the median. Whiskers show min and max values. Scale bars, (A) 5  $\mu\text{m}$ , and (D) 1  $\mu\text{m}$ .



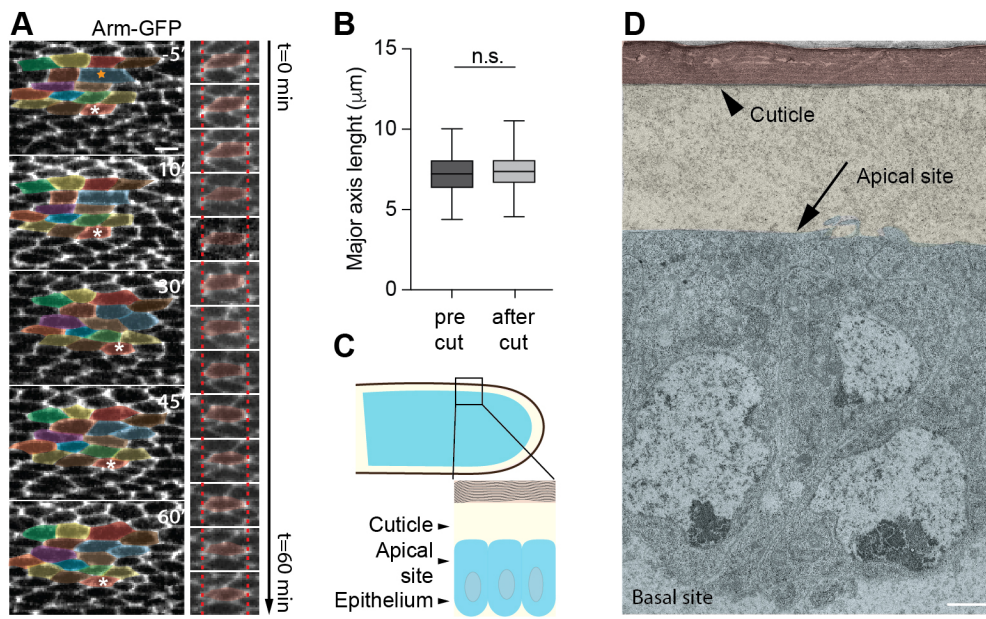

*Singh et al*  
Figure 6

**Supplemental Figure 1.** Wing tissue elongates between 14 and 18 hAPF.

(A) During pupal wing morphogenesis, the epithelium undergoes cell shape changes (between 14 to 18 hAPF) that are critical for the elongation of the wing. (A') Graph showing quantification of wing lengths marked as indicated by red lines in (A) (Ordinary one-way ANOVA, from left to right: \*\*\*\*  $p < 0.0001$ , \*\*\*\*  $p < 0.0001$ , \*\*\*\*  $p < 0.0001$ ,  $n=5$  pupae per genotype). Scale bars, 25  $\mu\text{m}$ . (B) 18 hAPF pupal wing grown at 25°C expressing Arm-GFP. The right panel shows the boxed region from left panel. Red arrowhead marks cell junction oriented along proximal-distal and yellow arrowhead marks anterior-posterior oriented junction. (C) Kymograph showing displacement of vertices upon laser ablation of cell junctions along proximal-distal (top, red dashed lines) and anterior-posterior (bottom, yellow dashed lines) axes. Black arrowhead points to the time of laser ablation. Notice that the displacement of vertices for junction along the proximal-distal axis is larger compared to that along the anterior-posterior axis in the same period of time.

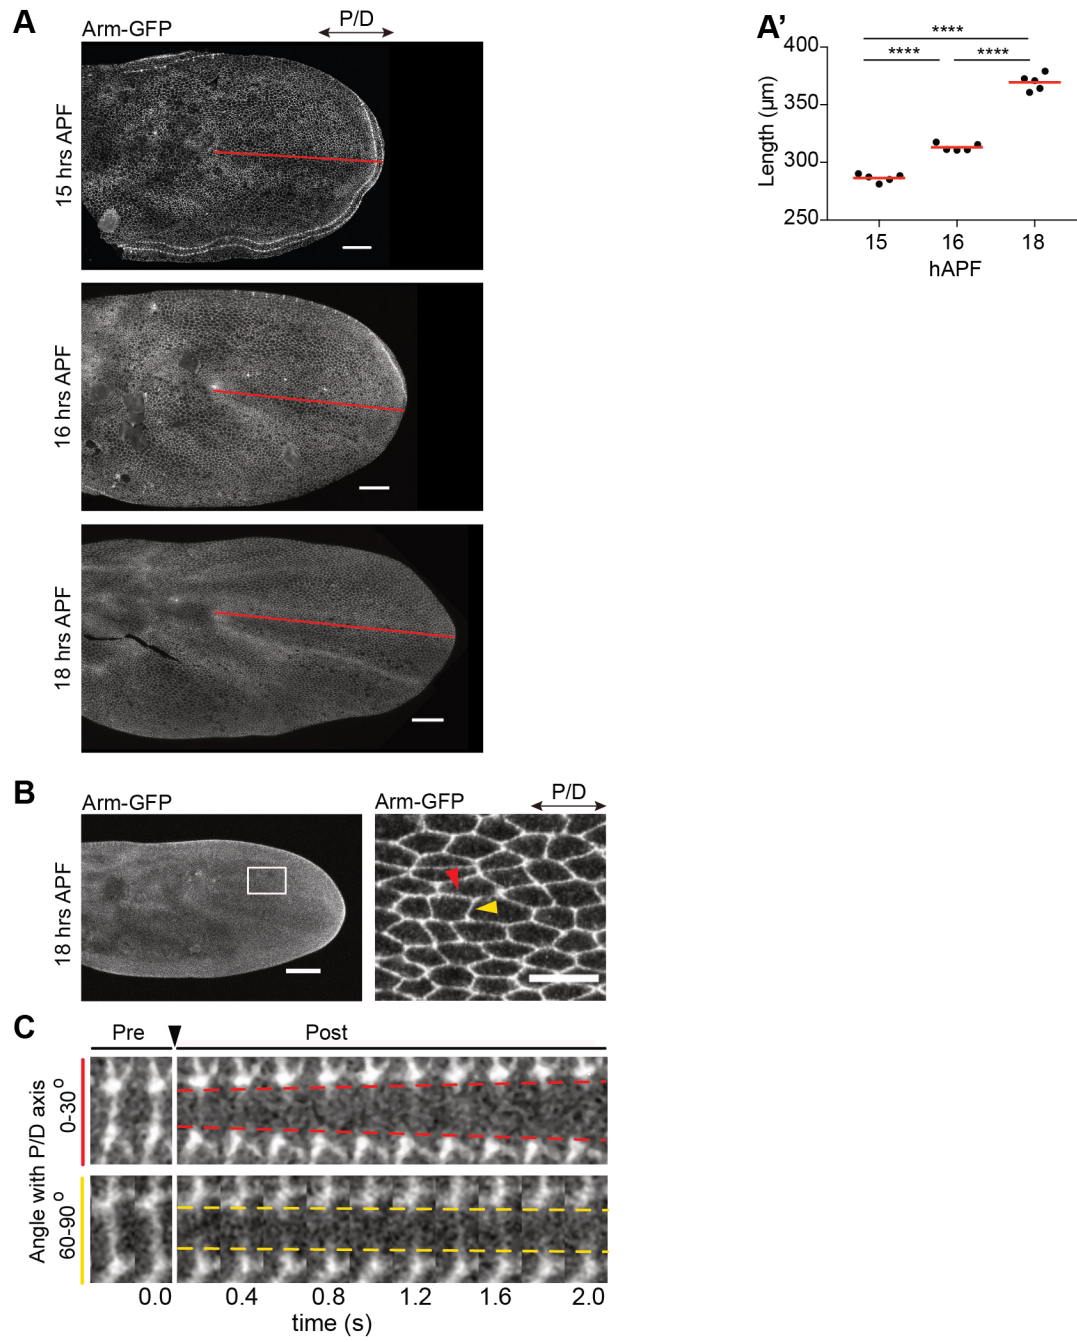

**Supplemental Figure 2.** Standardization of growth conditions for the developmental stage (~18 hAPF) at dual temperature regime.

(A) 18 hAPF pupal wing grown at 25°C expressing Arm-GFP. (A') shows the boxed region from (A). (B) Arm-GFP wing grown at a combination of 18°C and 29°C dual temperature regime using the tub-Gal80<sup>ts</sup> system to get developmental stage equivalent to 18 hAPF at 25°C. (B') shows the boxed region from (B). (C and D) Quantification of apical cell area (C) and elongation index (D) for Arm-GFP expressing flies grown at two different regimes. (C and D: Two-tailed, Mann-Whitney U-tests, n.s. (for C)  $p = 0.2374$ , n.s. (for D)  $p = 0.8631$ ,  $n=150$  cells and 3 pupae each for both the regimes). Boxes in all plots extend from the 25<sup>th</sup> to 75<sup>th</sup> percentiles, with a line at the median. Whiskers show min and max values. Images shown in (A-B') are representative of  $n=3$  wings and  $N=3$  independent experiments. Scale bars, (A and B) 100  $\mu\text{m}$ , (A' and B') 10  $\mu\text{m}$ . (E) Cartoon showing pupal wing grown at a combination of 18°C and 29°C dual temperature regime using the tub-Gal80<sup>ts</sup> system to get developmental stage equivalent to 18 hAPF at 25°C (top) and inset of cells from anterior compartment of the corresponding wing (bottom). The red dashed line (top) indicates the anterior-posterior wing boundary. Yellow thunder and black dashed line (bottom) indicate a scheme for laser ablation.

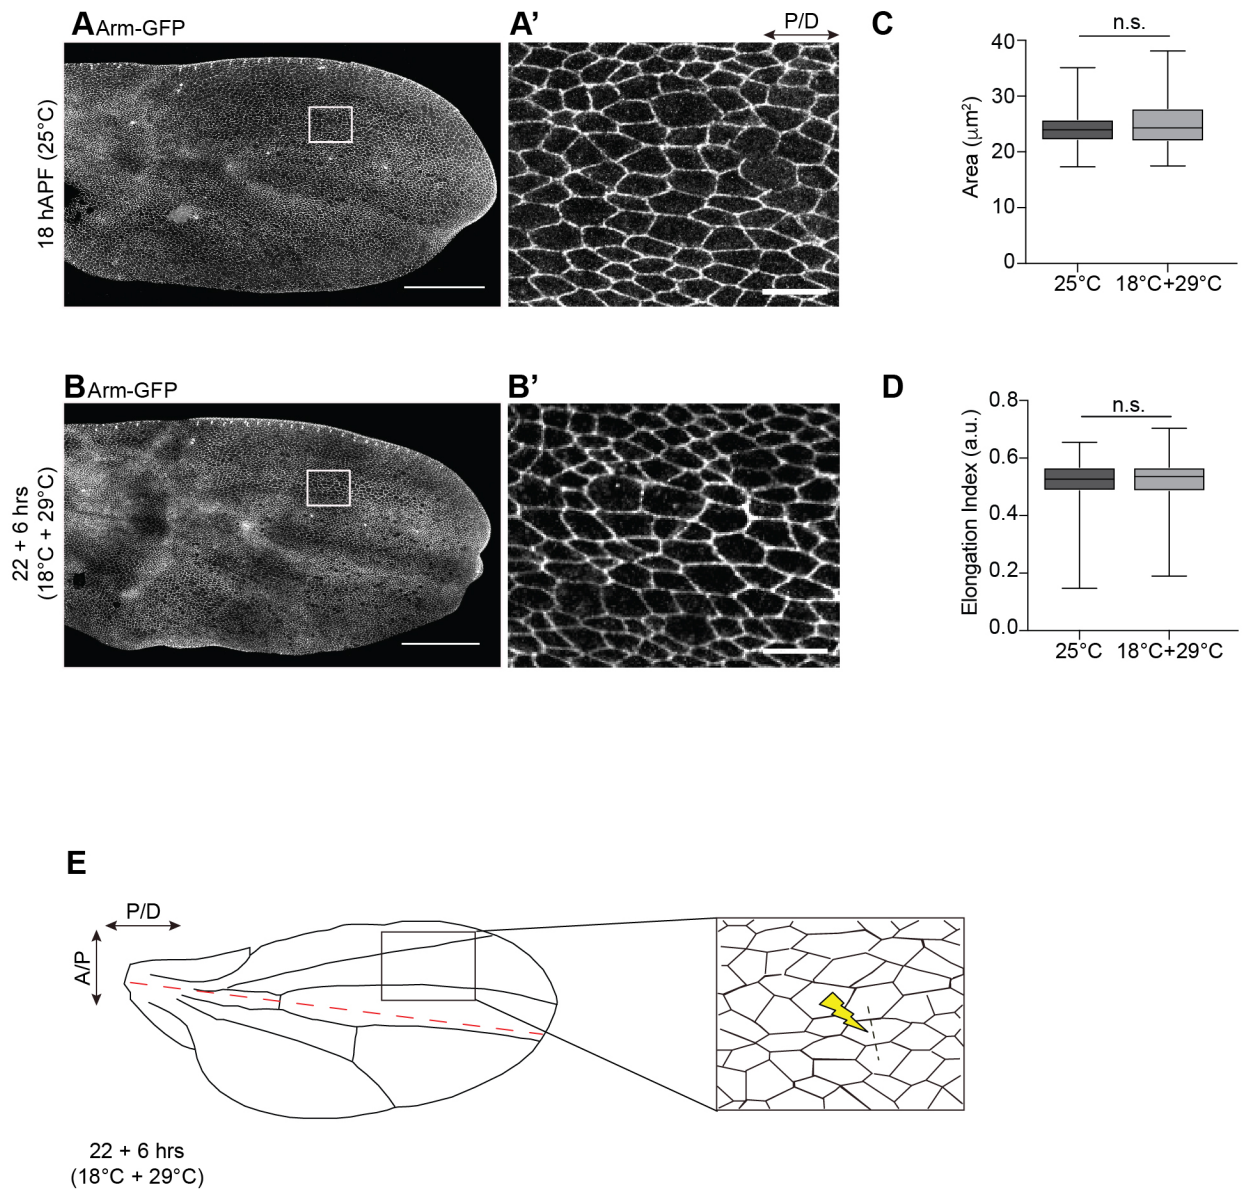



**Supplemental Figure 3.** deGradFP-mediated knockdown of Sqh-GFP produces known phenotypes consistent with loss of MyosinII function in *Drosophila* pupal wing (i.e., vein expansion, blisters and aberrant cell division).

(A) Quantification of L2 vein area for control wings and MyosinII depleted wings (deGradFP male and ZipDN-GFP male) (Ordinary one-way ANOVA, \*\*\*\*  $p < 0.0001$ ,  $n=3$  veins and 3 pupae per genotype). The graph shows bars indicating mean and sd.

(B and C) Images showing deGradFP female (B) and deGradFP male (C) adult flies grown at a combination of 18°C and 29°C temperature regime using the tub-Gal80<sup>ts</sup> system. Although adult wing hair orientation appears unaffected upon deGradFP expression (see panel G), note that some other defects are visible. With as low as 3 hrs of deGradFP expression, deGradFP male wings (C) show defects such as blisters (red arrow), curled up (black arrows) and droopy wings (white arrows). In contrast, deGradFP female (B) adult flies raised under the same conditions do not show any obvious wing phenotype(s) and can fly normally. Images shown in (B,C) are representative of 10 adult flies and 3 independent experiments.

(D-F) Images showing cell division event(s) in control flies (Sqh-GFP male, D), ZipDN-GFP male (E) and deGradFP male (F). Cells express Sqh-GFP (D,F) and ZipDN-GFP (E) and are stained with anti-Arm antibody to visualize cell outlines apically, anti- $\alpha$ -Tub antibody to visualize microtubules and DAPI to visualize nuclei in the cells. Cells in Sqh-GFP male (D) have two nuclei only when the cells undergo division, as evident by the presence of spindle microtubules, MyosinII enrichment at cleavage sites and rounded-up cell morphology (all indicated by broken white lines within the corresponding panels). However, cells in ZipDN-GFP male (E) and deGradFP male (F) show two nuclei (yellow dotted lines) even when the cells are not undergoing division as evident by the absence of spindle microtubules and presence of apical planar microtubules (yellow dotted lines) and non-rounded or elongated cell morphology (yellow dotted lines) when compared to cells undergoing division where spindle microtubules (white broken lines) and nuclear division (white broken lines) are observed. Images shown in D-F are representative of  $n=4$  pupae and  $N=3$  independent experiments.

(G) Representative images of Sqh-GFP male and deGradFP male wings equivalent to 24 hAPF (left panels), 30 hAPF (middle panels) at 25°C and in adult animals showing that wing PCP is independent of MyosinII activity. Wings were stained with anti-Flamingo antibody to visualize PCP organization and with Rhodamine phalloidin to visualize pre-hair



orientation. Images shown are representative of n=6 wings and N=3 independent experiments. Scale bars, (D-F) 5  $\mu\text{m}$ , (G, left) 10  $\mu\text{m}$ , (G, middle, right) 20  $\mu\text{m}$ .

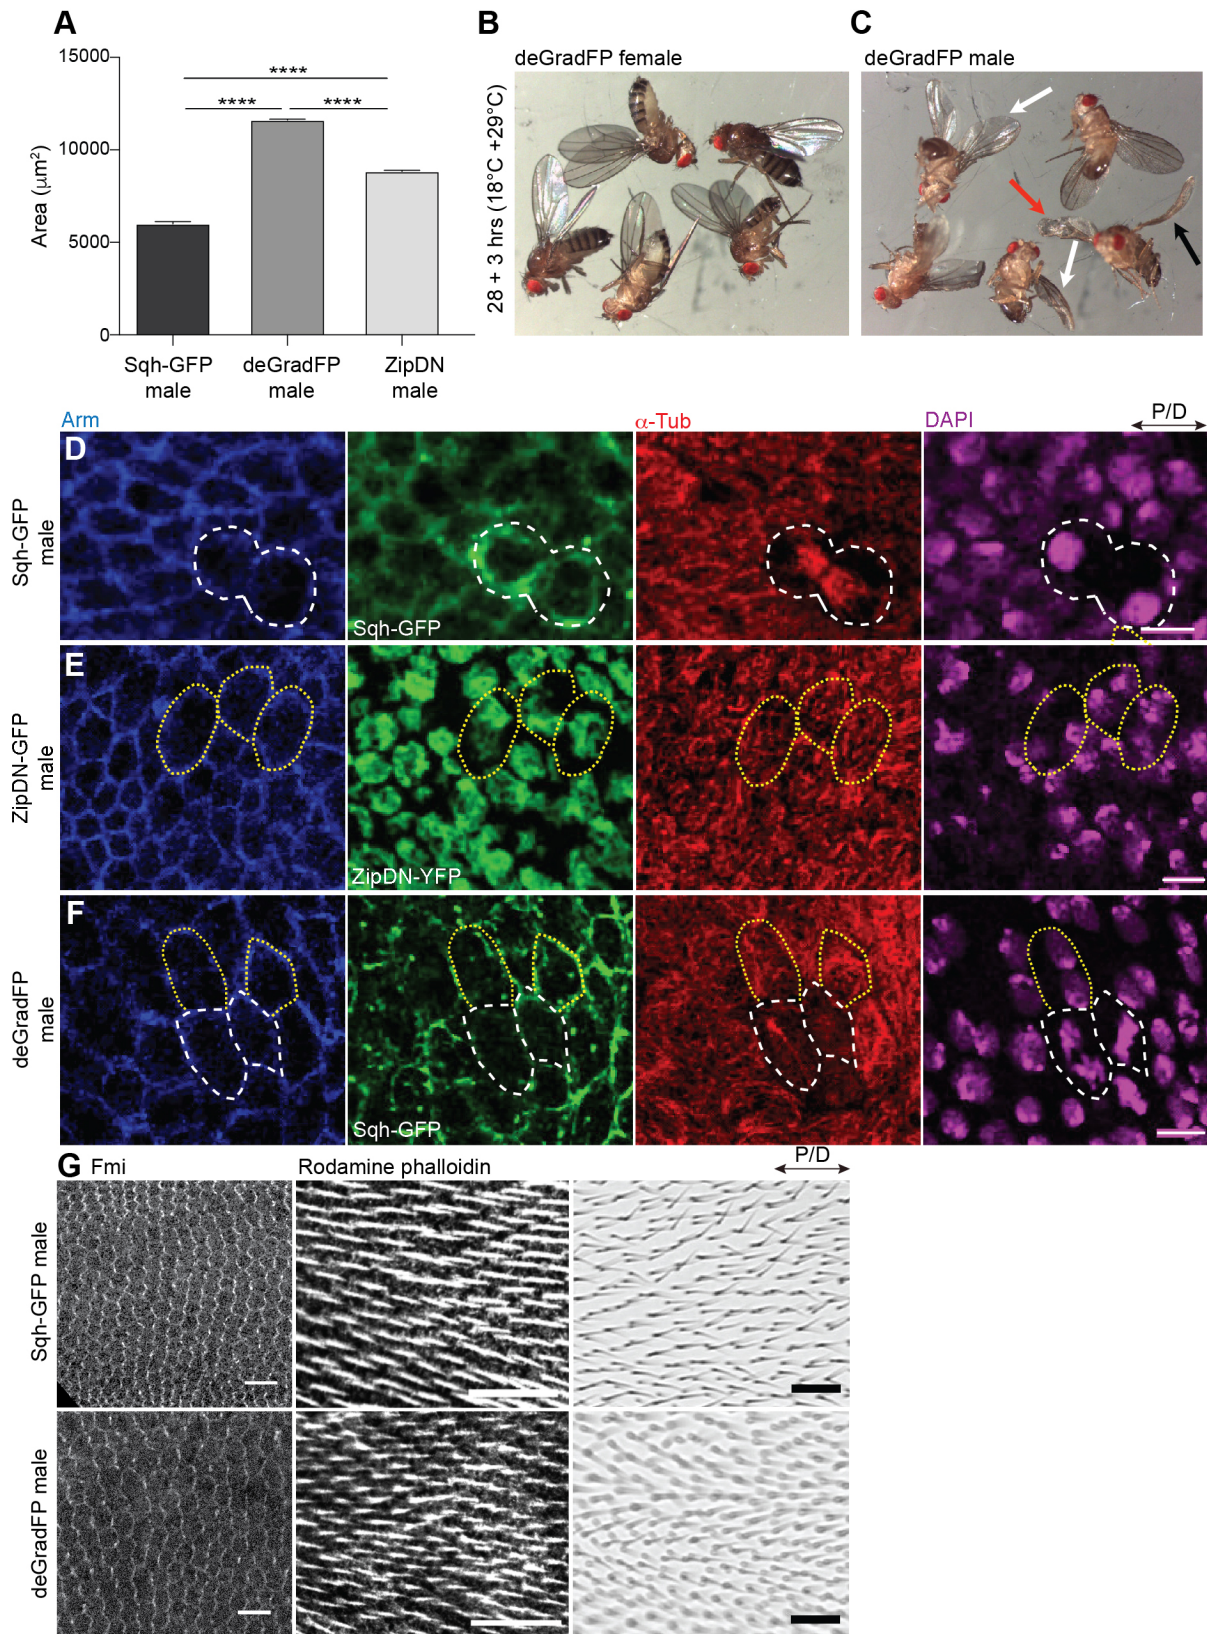

*Singh et al*  
Supplemental Figure 3

**Supplemental Figure 4.** DeGradFP specifically targets Sqh-GFP and shows no artifacts.

(A) Images showing anterior (top) and posterior (bellow) compartment in deGradFP female control flies (having one wild-type and one mutant copy of null mutation of *sqh*<sup>AX3</sup>) stained for Arm and pMRLC. In deGradFP female flies, phosphomyosin localizes to the junctions in the anterior and posterior compartments. (B) Representative images of Sqh-GFP male and deGradFP female wings at 18 hAPF show no difference. (C) Images of 18 hAPF wings of Sqh-GFP male (top) and deGradFP female (bottom) stained for Arm and  $\alpha$ -Tub to visualize microtubules. The orientation of microtubules is color-coded using OrientationJ. The images shown are representative of 4 wings and 3 independent experiments. (D) Quantification of microtubule alignment along proximal-distal axis for deGradFP female (Kruskal-Wallis tests, from left to right: \*\*\*\*  $p < 0.0001$ , \*\*\*\*  $p < 0.0001$ , \*\*\*\*  $p < 0.0001$ ,  $n=80-100$  cells and 3 pupae). Boxes in the plot extend from the 25<sup>th</sup> to 75<sup>th</sup> percentiles, with a line at the median. Whiskers show min and max values.

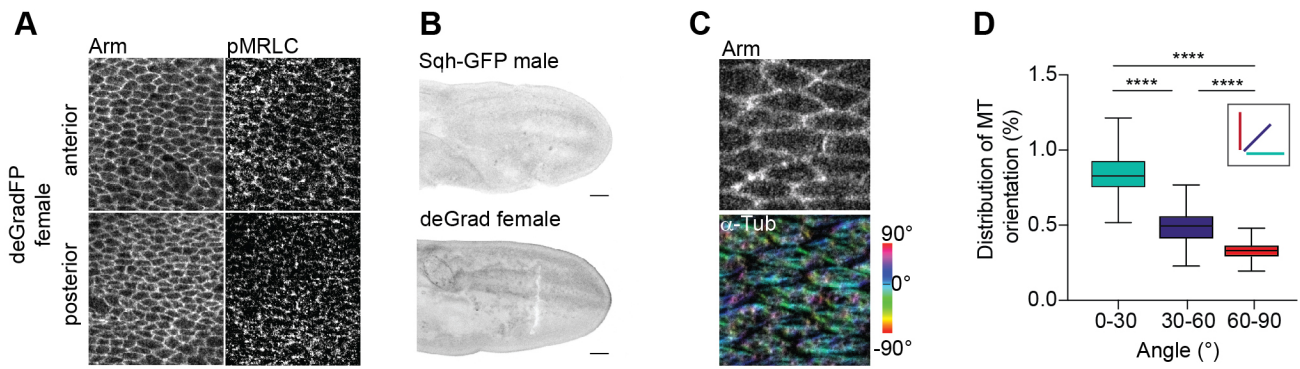

**Supplemental Figure 5.** Cell shape changes affect tissue shape.

(A) Graph showing quantification of 15 and 18 hAPF wild-type wing and *dumpy* and *ft-PCP* 18 hAPF mutant wing lengths marked as indicated by red lines in (Figure 1 - figure supplement 1) (Ordinary one-way ANOVA: n.s.  $p > 0.8127$ , \*\*\*\*  $p < 0.0001$ ,  $n=5$  pupae per genotype). Note that between 15 and 18 hAPF, wing epithelium undergoes significant extension. Likewise, the wing elongates normally in *dumpy* mutant animals, where the generation of global tissue stress is blocked. In the *ft-PCP* mutant, where cells fail to elongate, tissue is shorter. (B) Representative images of wild-type ( $w^{1118}$ ), *dachs* mutant ( $d^1/d^{GC13}$ ) and *MyosinVI* (*nub-Gal4>MyosinVI<sup>RNAi</sup>*) depleted wings showed no defects in tissue elongation. Number of analyzed wings ( $wt$ )=16/16,  $n(d)$ =40/40 and  $n(MyosinVI^{RNAi})$ =14. However, *dachs* mutant wings display abnormal vein patterning and knockdown of *MyosinVI* causes wing blisters.



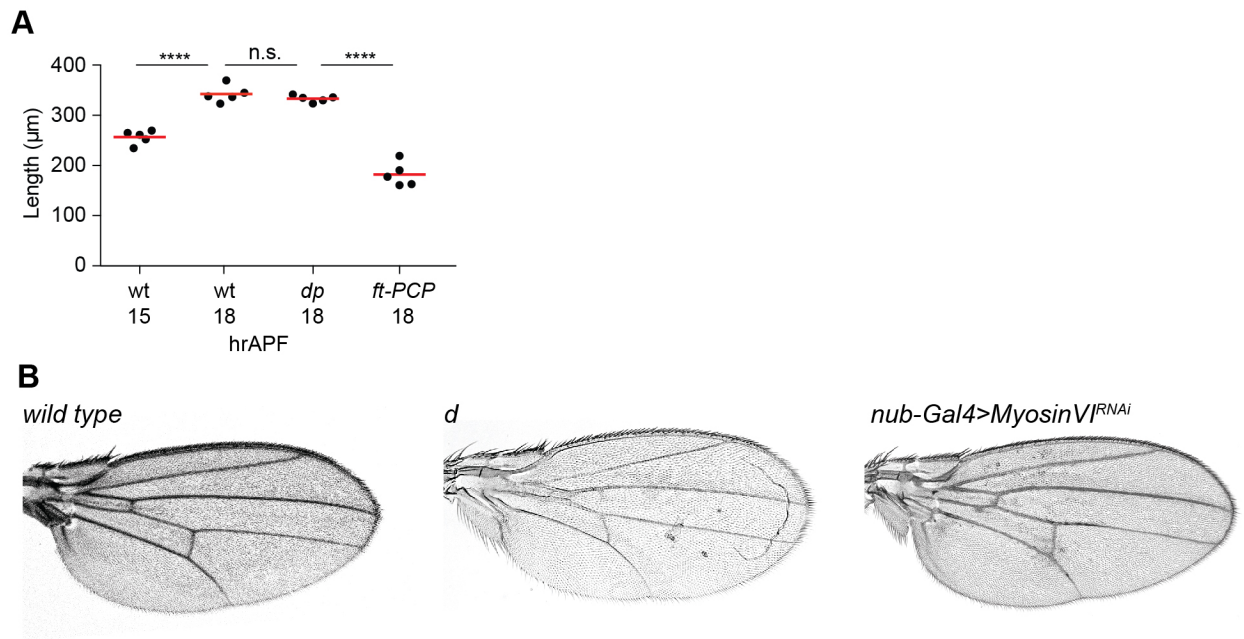



**Supplemental Figure 6.** Initial wing cell elongation is independent of extrinsic forces.

(A) Hinge ablation experiment (see Supplementary Video 1), showing whole pupae expressing Arm-GFP (top). The white dashed line marks the wing edge and the red line position of the laser cut. Below are time-lapse images of Arm-GFP before (5 min), during and after ablation of the wing (5 min and 20 min). (B) Representative images of wild-type and *ft-PCP* mutant wings showing normal hinge contraction. (B') Quantification of hinge contraction in wild-type and *ft-PCP* wings. In wild-type flies, 39/39 wings display normal hinge contraction and in *ft-PCP* adults, 47/47 wings. Scale bars, (A) 25  $\mu\text{m}$ .

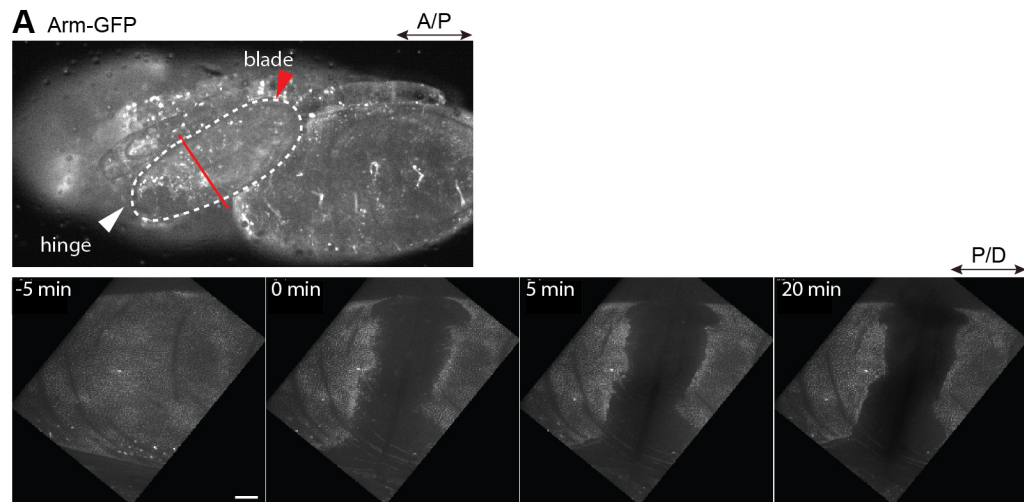

**B** *wild type*

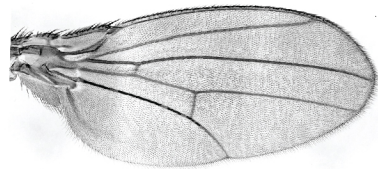

*ft-PCP*

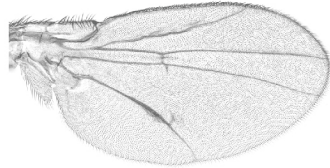

**B'**

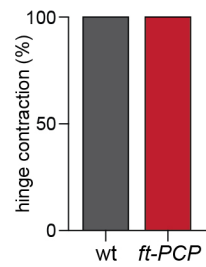

*Singh et al*  
Supplemental Figure 6

**Table 1.** A table summarizing the dual temperature regimes deployed for the analysis of different parameters using the deGradFP system.

| <b>Temperature regimes (at 18°C+29°C)</b> | <b>Equivalent stage (at 25°C)</b> | <b>Assay(s) done using the regime</b>                                                                                                                                                                             | <b>Explanation of the regime (in brief)</b>                                                         |
|-------------------------------------------|-----------------------------------|-------------------------------------------------------------------------------------------------------------------------------------------------------------------------------------------------------------------|-----------------------------------------------------------------------------------------------------|
| <b>22+6.5 hrs</b>                         | 18 hAPF                           | <ul style="list-style-type: none"> <li>• Standardisation for 18 hAPF pupal wing.</li> <li>• Tension analysis (laser ablation).</li> <li>• Cell shape and area analysis.</li> <li>• MT alignment assay.</li> </ul> | 0 hAPF pre-pupae collected and grown at 18°C for 22 hrs followed by incubation at 29°C for 6.5 hrs. |
| <b>22+14 hrs</b>                          | 24 hAPF                           | <ul style="list-style-type: none"> <li>• PCP organisation and cell area analysis</li> <li>• Vein area analysis</li> </ul>                                                                                         | 0 hAPF pre-pupae collected and grown at 18°C for 22 hrs followed by incubation at 29°C for 14 hrs.  |
| <b>22+20 hrs</b>                          | 30 hAPF                           | <ul style="list-style-type: none"> <li>• Pupal wing hair polarity</li> </ul>                                                                                                                                      | 0 hAPF pre-pupae collected and grown at 18°C for 22 hrs followed by incubation at 29°C for 20 hrs.  |
| <b>28+3 hrs</b>                           | N/A                               | <ul style="list-style-type: none"> <li>• Adult wing hair polarity.</li> <li>• Adult wing morphology.</li> </ul>                                                                                                   | 0 hAPF pre-pupae collected and grown at 18°C for 22 hrs followed by incubation at 29°C for 3 hrs.   |
| <b>0+24 hrs</b>                           | N/A                               | <ul style="list-style-type: none"> <li>• Cell division defects.</li> </ul>                                                                                                                                        | 0 hAPF pre-pupae collected and grown at 29°C for 24 hrs.                                            |

### **Video 1. Hinge ablation experiment.**

Live imaging of hinge region of 18 hAPF pupal wing expressing Arm-GFP before and after ablation. Scale bar, 25  $\mu\text{m}$ .
